# Supplementary material
Source: PubMed Central journal article supplement (PMC10270109)
Supplement: S1368980018002975sup001.pdf [file S1368980018002975sup001.pdf]

**Supplementary Table 1:** Risk factors, definitions, theoretical minimum risk exposure levels and data representative index (*source: GBD 2015 Risk Factors Collaborators. Global, regional, and national comparative risk assessment of 79 behavioural, environmental and occupational, and metabolic risks or clusters of risks, 1990–2015: a systematic analysis for the Global Burden of Disease Study 2015. The Lancet. 2016 Oct 7; 388:1659–1724.*)

| Risk factors                             | Definition                                                                                                                                                                                                                          | Theoretical minimum risk exposure level                                       | Data representative index (global) |
|------------------------------------------|-------------------------------------------------------------------------------------------------------------------------------------------------------------------------------------------------------------------------------------|-------------------------------------------------------------------------------|------------------------------------|
| <b>Child and maternal undernutrition</b> |                                                                                                                                                                                                                                     |                                                                               | 93.9%                              |
| <b>Suboptimal breastfeeding</b>          |                                                                                                                                                                                                                                     |                                                                               | 77.8%                              |
| Non-exclusive breastfeeding              | Proportion of children younger than 6 months who receive predominant, partial, or no breastfeeding                                                                                                                                  | All children are exclusively breastfed for first 6 months of life             | 77.8%                              |
| Discontinued breastfeeding               | Proportion of children aged 6–23 months who do not receive any breastmilk                                                                                                                                                           | All children continue to receive breastmilk until 2 years of age              | 79.2%                              |
| <b>Childhood undernutrition</b>          |                                                                                                                                                                                                                                     |                                                                               | 79.3%                              |
| Childhood underweight                    | Proportion of children less than -3 SDs, -3 to -2 SDs, and -2 to -1 SDs of the WHO 2006 standard weight-for-age curve                                                                                                               | All children are above -1 SD of the WHO 2006 standard weight-for-age curve    | 78.8%                              |
| Childhood wasting                        | Proportion of children less than -3 SDs, -3 to -2 SDs, and -2 to -1 SDs of the WHO 2006 standard weight-for-length curve                                                                                                            | All children are above -1 SD of the WHO 2006 standard weight-for-height curve | 79.3%                              |
| Childhood stunting                       | Proportion of children less than -3 SDs, -3 to -2 SDs, and -2 to -1 SDs of the WHO 2006 standard height-for-age curve                                                                                                               | All children are above -1 SD of the WHO 2006 standard height-for-age curve    | 93.7%                              |
| Iron deficiency                          | Peripheral blood haemoglobin concentration in g/L                                                                                                                                                                                   | Country specific                                                              | 68.3%                              |
| Vitamin A deficiency                     | Proportion of children aged 28 days to 5 years with serum retinol concentration <0.7 $\mu$ mol/L                                                                                                                                    | No childhood vitamin A deficiency                                             | 40.9%                              |
| Zinc deficiency                          | Proportion of the population with inadequate zinc intake versus loss                                                                                                                                                                | No inadequate zinc intake                                                     | 84.3%                              |
| <b>Overall dietary risks</b>             |                                                                                                                                                                                                                                     |                                                                               | 92.9%                              |
| Diet low in fruits                       | Average daily consumption of fruits (fresh, frozen, cooked, canned, or dried, excluding fruit juices and salted or pickled fruits)                                                                                                  | Consumption of fruit between 200 g and 300 g per day                          | 88.9%                              |
| Diet low in vegetables                   | Average daily consumption of vegetables (fresh, frozen, cooked, canned, or dried vegetables, including legumes but excluding salted or pickled vegetables, juices, nuts and seeds, and starchy vegetables such as potatoes or corn) | Consumption of vegetables between 340 g and 500 g per day                     | 88.9%                              |
| Diet low in whole grains                 | Average daily consumption of whole grains (bran, germ, and endosperm in their natural proportion) from breakfast cereals, bread, rice, pasta, biscuits, muffins, tortillas, pancakes, and other sources                             | Consumption of whole grains between 100 g and 150 g per day                   | 16.2%                              |
| Diet low in nuts and seeds               | Average daily consumption of nut and seed foods                                                                                                                                                                                     | Consumption of nuts and seeds between 16 g and 25 g per day                   | 88.9%                              |
| Diet low in milk                         | Average daily consumption of milk, including non-fat, low fat, and full-fat milk, excluding soy milk and other plant derivatives                                                                                                    | Consumption of milk between 350 g and 520 g per day                           | 88.9%                              |
| Diet high in red meat                    | Average daily consumption of red meat (beef, pork, lamb, and goat but excluding poultry, fish, eggs, and all processed meats)                                                                                                       | Consumption of red meat between 18 g and 27 g per day                         | 88.9%                              |

|                                         |                                                                                                                                                                                                       |                                                                                     |       |
|-----------------------------------------|-------------------------------------------------------------------------------------------------------------------------------------------------------------------------------------------------------|-------------------------------------------------------------------------------------|-------|
| Diet high in processed meat             | Average daily consumption of meat preserved by smoking, curing, salting, or addition of chemical preservatives                                                                                        | Consumption of processed meat between 0 g and 4 g per day                           | 27.3% |
| Diet high in sugar sweetened beverages  | Average daily consumption of beverages with $\geq 50$ kcal per 226.8 g serving, including carbonated beverages, sodas, energy drinks, and fruit drinks, but excluding 100% fruit and vegetable juices | Consumption of sugar-sweetened beverages between 0 g and 5 g per day                | 26.8% |
| Diet low in fibre                       | Average daily intake of fibre from all sources including fruits, vegetables, grains, legumes, and pulses                                                                                              | Consumption of fibre between 19 g and 28 g per day                                  | 88.9% |
| Diet suboptimal in calcium              | Average daily intake of calcium from all sources, including milk, yogurt, and cheese                                                                                                                  | Consumption of calcium between 1.0 g and 1.50 g per day                             | 88.9% |
| Diet low in seafood omega-3 fatty acids | Average daily intake of eicosapentaenoic acid and docosahexaenoic acid                                                                                                                                | Consumption of seafood omega-3 fatty acids between 200 mg and 300 mg per day        | 88.9% |
| Diet low in polyunsaturated fatty acids | Average daily intake of omega-6 fatty acids from all sources, mainly liquid vegetable oils, including soybean oil, corn oil, and safflower oil                                                        | Consumption of polyunsaturated fatty acids between 9% and 13% of total daily energy | 88.9% |
| Diet high in trans fatty acids          | Average daily intake of trans fat from all sources, mainly partially hydrogenated vegetable oils and ruminant products                                                                                | Consumption of trans fatty acids between 0% and 1.0 % of total daily energy         | 39.9% |
| Diet high in sodium                     | 24 h urinary sodium measured in mg per day                                                                                                                                                            | Consumption of sodium between 1.0 g and 5.0 g per day                               | 32.3% |
| <b>High body-mass index</b>             | Body-mass index, measured in $\text{kg}/\text{m}^2$                                                                                                                                                   | 20-25 $\text{kg}/\text{m}^2$                                                        | 90.9% |

**Supplementary Table 2:** Data sources used for estimation of mortality associated with maternal and child under nutrition in sub-Saharan Africa in the Global Burden of Diseases (GBD) study (**source:** <http://ghdx.healthdata.org/gbd-2015-data-citations>)

| No | Data sources                                                                                                                                                                                                                                                                                                                                                                             |
|----|------------------------------------------------------------------------------------------------------------------------------------------------------------------------------------------------------------------------------------------------------------------------------------------------------------------------------------------------------------------------------------------|
| 1  | Central Bureau of Statistics (Kenya), United Nations Children's Fund (UNICEF). Kenya Multiple Indicator Cluster Survey 2000. New York, United States: United Nations Children's Fund (UNICEF)                                                                                                                                                                                            |
| 2  | Kenya National Bureau of Statistics, United Nations Children's Fund (UNICEF). Kenya - Eastern Province Multiple Indicator Cluster Survey 2008. Nairobi, Kenya: Kenya National Bureau of Statistics                                                                                                                                                                                       |
| 3  | Bureau of Statistics (Liberia), United Nations Children's Fund (UNICEF). Liberia Multiple Indicator Cluster Survey 1995                                                                                                                                                                                                                                                                  |
| 4  | Macro International, Inc, National Institute of Statistics and Economic Analysis (INSAE) (Benin). Benin Demographic and Health Survey 1996. Calverton, United States: Macro International, Inc                                                                                                                                                                                           |
| 5  | National Institute of Statistics and Economic Analysis (INSAE) (Benin), ORC Macro. Benin Demographic and Health Survey 2001. Calverton, United States: ORC Macro                                                                                                                                                                                                                         |
| 6  | National Institute of Statistics and Economic Analysis (INSAE) (Benin), National Program Against AIDS (PNLS) (Benin), Macro International, Inc. Benin Demographic and Health Survey 2006. Calverton, United States: Macro International, Inc                                                                                                                                             |
| 7  | Macro International, Inc, National Center for Statistics and Economic Studies (Congo, Rep.). Congo Demographic and Health Survey 2005. Calverton, United States: Macro International, Inc                                                                                                                                                                                                |
| 8  | Macro Systems, Inc.; Institute for Resource Development, National Council for Population Development (NCPD). Kenya Demographic and Health Survey 1988-1989. Columbia, United States: Macro Systems, Inc                                                                                                                                                                                  |
| 9  | Central Bureau of Statistics (Kenya), Macro International, Inc, National Council for Population Development (NCPD). Kenya Demographic and Health Survey 1993. Calverton, United States: Macro International, Inc                                                                                                                                                                         |
| 10 | Central Bureau of Statistics (Kenya), Macro International, Inc, National Council for Population Development (NCPD). Kenya Demographic and Health Survey 1998. Calverton, United States: Macro International, Inc                                                                                                                                                                         |
| 11 | Centers for Disease Control and Prevention (CDC), Central Bureau of Statistics (Kenya), Macro International, Inc, Ministry of Health (Kenya), National Council for Population and Development (Kenya). Kenya Demographic and Health Survey 2003. Calverton, United States: Macro International, Inc                                                                                      |
| 12 | Ministry of Planning and Economic Affairs (Liberia), Westinghouse; Institute for Resource Development. Liberia Demographic and Health Survey 1986. Columbia, United States: Westinghouse; Institute for Resource Development                                                                                                                                                             |
| 13 | Liberia Institute for Statistics and Geo-information Services (LISGIS), Macro International, Inc. Liberia Demographic and Health Survey 2006-2007. Calverton, United States: Macro International, Inc                                                                                                                                                                                    |
| 14 | Macro Systems, Inc.; Institute for Resource Development, Makerere University, Ministry of Health (Uganda). Uganda Demographic and Health Survey 1988-1989. Columbia, United States: Macro Systems, Inc                                                                                                                                                                                   |
| 15 | Macro International, Inc, Statistics Department (Uganda). Uganda Demographic and Health Survey 1995. Calverton, United States: Macro International, Inc                                                                                                                                                                                                                                  |
| 16 | Macro International, Inc, Uganda Bureau of Statistics. Uganda Demographic and Health Survey 2000-2001. Calverton, United States: Macro International, Inc                                                                                                                                                                                                                                |
| 17 | Macro International, Inc, Uganda Bureau of Statistics. Uganda Demographic and Health Survey 2006. Calverton, United States: Macro International, Inc                                                                                                                                                                                                                                     |
| 18 | ICF Macro, Kenya Medical Research Institute (KEMRI), Kenya National Bureau of Statistics, Ministry of Public Health and Sanitation (Kenya), National AIDS and STI Control Program (Kenya), National Aids Control Council (NACC), National Coordinating Agency for Population and Development (Kenya). Kenya Demographic and Health Survey 2008-2009. Calverton, United States: ICF Macro |
| 19 | ICF Macro, Uganda Bureau of Statistics. Uganda Demographic and Health Survey 2011. Calverton, United States: ICF Macro                                                                                                                                                                                                                                                                   |
| 20 | ICF International, Ministry of Health (Congo, Rep.), National Center for Statistics and Economic Studies (Congo, Rep.). Congo Demographic and Health Survey 2011-2012. Fairfax, United States: ICF International, 2013                                                                                                                                                                   |
| 21 | Kenya National Bureau of Statistics, United Nations Children's Fund (UNICEF). Kenya - Coast Multiple Indicator Cluster Survey 2009. New York, United States: United Nations Children's Fund (UNICEF), 2014                                                                                                                                                                               |
| 22 | ICF International, Liberia Institute for Statistics and Geo-information Services (LISGIS), National AIDS and STI Control Program (NACP), Ministry of Health and Social Welfare (Liberia). Liberia Demographic and Health Survey 2013                                                                                                                                                     |
| 23 | ICF International, National Institute of Statistics and Economic Analysis (INSAE) (Benin), National Program Against AIDS (PNLS) (Benin). Benin Demographic and Health Survey 2011-2012. Fairfax, United States: ICF International, 2014                                                                                                                                                  |
| 24 | National Institute of Statistics and Demography (Burkina Faso), United Nations Children's Fund (UNICEF). Burkina Faso Multiple Indicator Cluster Survey 2006. New York, United States: United Nations Children's Fund (UNICEF)                                                                                                                                                           |
| 25 | Ministry of Planning and Reconstruction (Congo, DR), United Nations Children's Fund (UNICEF). Congo, DR Multiple Indicator Cluster Survey 2001. New York, United States: United Nations Children's Fund (UNICEF)                                                                                                                                                                         |
| 26 | Central Statistical Office (Zambia), London School of Hygiene and Tropical Medicine. Zambia Living Conditions Monitoring Survey 1998. Lusaka, Zambia: Central Statistical Office (Zambia)                                                                                                                                                                                                |
| 27 | Central Statistical Office (Zambia). Zambia Living Conditions Monitoring Survey 2002-2003. Lusaka, Zambia: Central Statistical Office (Zambia)                                                                                                                                                                                                                                           |

|    |                                                                                                                                                                                                                                                                                                               |
|----|---------------------------------------------------------------------------------------------------------------------------------------------------------------------------------------------------------------------------------------------------------------------------------------------------------------|
| 28 | Central Statistical Office (Zambia). Zambia Living Conditions Monitoring Survey 2004-2005. Lusaka, Zambia: Central Statistical Office (Zambia)                                                                                                                                                                |
| 29 | Centers for Disease Control and Prevention (CDC), Central Statistical Office (Zambia), Food Security, Health and Nutrition Information System (Zambia), Food and Agriculture Organization of the United Nations (FAO), United Nations Children's Fund (UNICEF). Zambia Multiple Indicator Cluster Survey 1995 |
| 30 | Central Statistical Office (Zambia), Food Security, Health and Nutrition Information System (Zambia), United Nations Children's Fund (UNICEF). Zambia Multiple Indicator Cluster Survey 1999. New York, United States: United Nations Children's Fund (UNICEF)                                                |
| 31 | Macro International, Inc, National Institute of Statistics and Demography (Burkina Faso). Burkina Faso Demographic and Health Survey 1992-1993. Calverton, United States: Macro International, Inc                                                                                                            |
| 32 | Macro International, Inc, National Institute of Statistics and Demography (Burkina Faso). Burkina Faso Demographic and Health Survey 1998-1999. Calverton, United States: Macro International, Inc                                                                                                            |
| 33 | Macro International, Inc, National Institute of Statistics and Demography (Burkina Faso). Burkina Faso Demographic and Health Survey 2003. Calverton, United States: Macro International, Inc                                                                                                                 |
| 34 | ICF Macro, Ministry of Health (Burkina Faso), National Institute of Statistics and Demography (Burkina Faso). Burkina Faso Demographic and Health Survey 2010-2011. Calverton, United States: ICF Macro                                                                                                       |
| 35 | Macro International, Inc, Ministry of Planning (Congo, DR). Democratic Republic of the Congo Demographic and Health Survey 2007. Calverton, United States: Macro International, Inc                                                                                                                           |
| 36 | Department of Applied Research for Development (Madagascar), Macro International, Inc. Madagascar Demographic and Health Survey 1992. Calverton, United States: Macro International, Inc                                                                                                                      |
| 37 | Macro International, Inc, National Institute of Statistics (Madagascar). Madagascar Demographic and Health Survey 1997. Calverton, United States: Macro International, Inc                                                                                                                                    |
| 38 | Macro International, Inc, National Institute of Statistics (Madagascar). Madagascar Demographic and Health Survey 2003-2004. Calverton, United States: Macro International, Inc                                                                                                                               |
| 39 | Macro International, Inc, Ministry of Health (Mali), National Directorate of Statistics and Informatics (DNSI) (Mali). Mali Demographic and Health Survey 2006. Calverton, United States: Macro International, Inc                                                                                            |
| 40 | Sahel Institute, Westinghouse; Institute for Resource Development. Mali Demographic and Health Survey 1987. Columbia, United States: Westinghouse; Institute for Resource Development                                                                                                                         |
| 41 | Macro International, Inc, National Directorate of Statistics and Informatics (DNSI) (Mali), Planning and Statistics Unit, Ministry of Health (Mali). Mali Demographic and Health Survey 1995-1996. Calverton, United States: Macro International, Inc                                                         |
| 42 | Macro International, Inc, National Directorate of Statistics and Informatics (DNSI) (Mali), Planning and Statistics Unit, Ministry of Health (Mali). Mali Demographic and Health Survey 2001. Calverton, United States: Macro International, Inc                                                              |
| 43 | Central Statistical Office (Zambia), Macro International, Inc, University of Zambia. Zambia Demographic and Health Survey 1992. Calverton, United States: Macro International, Inc                                                                                                                            |
| 44 | Central Statistical Office (Zambia), Macro International, Inc, Ministry of Health (Zambia). Zambia Demographic and Health Survey 1996-1997. Calverton, United States: Macro International, Inc                                                                                                                |
| 45 | Central Board of Health (Zambia), Central Statistical Office (Zambia), Macro International, Inc. Zambia Demographic and Health Survey 2001-2002. Calverton, United States: Macro International, Inc                                                                                                           |
| 46 | Central Statistical Office (Zambia), Macro International, Inc. Zambia Demographic and Health Survey 2007. Calverton, United States: Macro International, Inc                                                                                                                                                  |
| 47 | ICF Macro, National Institute of Statistics (Madagascar). Madagascar Demographic and Health Survey 2008-2009. Calverton, United States: ICF Macro, 2010                                                                                                                                                       |
| 48 | National Institute of Statistics (Madagascar), United Nations Children's Fund (UNICEF). Madagascar Multiple Indicator Cluster Survey 2000. New York, United States: United Nations Children's Fund (UNICEF)                                                                                                   |
| 49 | Central Statistical Office (Zambia). Zambia Living Conditions Monitoring Survey 2010                                                                                                                                                                                                                          |
| 50 | ICF International, INFO-STAT (Mali), Ministry of Health (Mali), National Institute of Statistics (INSTAT) (Mali), Planning and Statistics Unit, Ministry of Health (Mali). Mali Demographic and Health Survey 2012-2013. Fairfax, United States: ICF International, 2014                                      |
| 51 | United Nations Children's Fund (UNICEF), National Institute of Statistics (Cameroon). Cameroon Multiple Indicator Cluster Survey 2006. New York, United States: United Nations Children's Fund (UNICEF)                                                                                                       |
| 52 | Ministry of Planning, Economic Development and Public Investment (Equatorial Guinea), United Nations Children's Fund (UNICEF). Equatorial Guinea Multiple Indicator Cluster Survey 2000. New York, United States: United Nations Children's Fund (UNICEF)                                                     |
| 53 | National Statistical Office of Malawi, United Nations Children's Fund (UNICEF). Malawi Multiple Indicator Cluster Survey 1995                                                                                                                                                                                 |
| 54 | United Nations Children's Fund (UNICEF), National Statistics Office (Malawi). Malawi Multiple Indicator Cluster Survey 2006. New York, United States: United Nations Children's Fund (UNICEF)                                                                                                                 |
| 55 | National Office of Statistics (Mauritania), United Nations Children's Fund (UNICEF). Mauritania Multiple Indicator Cluster Survey 2007. New York, United States: United Nations Children's Fund (UNICEF)                                                                                                      |
| 56 | Macro International, Inc, Ministry of Economy, Planning and Regional Development (Cameroon). Cameroon Demographic and Health Survey 1991. Calverton, United States: Macro International, Inc                                                                                                                  |
| 57 | Central Bureau of the Census and Population Studies (Cameroon), Macro International, Inc. Cameroon Demographic and Health Survey 1998. Calverton, United States: Macro International, Inc                                                                                                                     |
| 58 | Macro International, Inc, National Institute of Statistics (Cameroon). Cameroon Demographic and Health Survey 2004. Calverton, United States: Macro International, Inc                                                                                                                                        |
| 59 | ICF International, Ministry of Economy, Planning and Regional Development (Cameroon), Ministry of Public Health (Cameroon), National Institute of Statistics (Cameroon), Pasteur Center of Cameroon. Cameroon Demographic and Health Survey 2011. Fairfax, United States: ICF International                   |
| 60 | Macro International, Inc, National Statistical Office of Malawi. Malawi Demographic and Health Survey 1992. Calverton, United States: Macro International, Inc                                                                                                                                                |
| 61 | Macro International, Inc, National Statistical Office of Malawi. Malawi Demographic and Health Survey 2000. Calverton, United States: Macro International, Inc                                                                                                                                                |
| 62 | Macro International, Inc, National Statistical Office of Malawi. Malawi Demographic and Health Survey 2004-2005. Calverton, United States: Macro International, Inc                                                                                                                                           |

|    |                                                                                                                                                                                                                                                                            |
|----|----------------------------------------------------------------------------------------------------------------------------------------------------------------------------------------------------------------------------------------------------------------------------|
| 63 | ICF Macro, National Statistical Office of Malawi. Malawi Demographic and Health Survey 2010. Calverton, United States: ICF Macro                                                                                                                                           |
| 64 | ICF International, Ministry of Health and Social Welfare (Equatorial Guinea), Ministry of Planning, Economic Development and Public Investment (Equatorial Guinea). Equatorial Guinea Demographic and Health Survey 2011                                                   |
| 65 | Central Statistics Office (Botswana). Botswana Family Health Survey 1996. Gaborone, Botswana: Central Statistics Office (Botswana)                                                                                                                                         |
| 66 | Central Statistics Office (Botswana), United Nations Children's Fund (UNICEF). Botswana Multiple Indicator Cluster Survey 2000. New York, United States: United Nations Children's Fund (UNICEF), 2015                                                                     |
| 67 | Government of Niger, Macro International, Inc, United Nations Children's Fund (UNICEF). Niger Multiple Indicator Cluster Survey 2000. New York, United States: United Nations Children's Fund (UNICEF)                                                                     |
| 68 | Centers for Disease Control and Prevention (CDC), Government of Niger, United Nations Children's Fund (UNICEF), United Nations Population Fund (UNFPA). Niger Multiple Indicator Cluster Survey 1996                                                                       |
| 69 | Central Statistics Office (Botswana), Macro Systems, Inc.; Institute for Resource Development, Ministry of Health (Botswana). Botswana Demographic and Health Survey 1988. Columbia, United States: Macro Systems, Inc.; Institute for Resource Development                |
| 70 | General Directorate of Statistics and Economic Studies (Gabon), Macro International, Inc. Gabon Demographic and Health Survey 2000-2001. Calverton, United States: Macro International, Inc                                                                                |
| 71 | Department of Statistics and National Accounts (Niger), Macro International, Inc. Niger Demographic and Health Survey 2006. Calverton, United States: Macro International, Inc                                                                                             |
| 72 | Department of Statistics and National Accounts (Niger), Macro International, Inc. Niger Demographic and Health Survey 1992. Calverton, United States: Macro International, Inc                                                                                             |
| 73 | CARE International, Macro International, Inc. Niger Demographic and Health Survey 1998. Calverton, United States: Macro International, Inc                                                                                                                                 |
| 74 | Macro International, Inc, Ministry of Health (Cape Verde), National Institute of Statistics (Cape Verde). Cape Verde Demographic and Health Survey 2005                                                                                                                    |
| 75 | Central Statistics Office (Botswana). Botswana Family Health Survey 2007-2008. Gaborone, Botswana: Central Statistics Office (Botswana), 2009                                                                                                                              |
| 76 | Cape Verde National Statistics Institute (INE) Division of Reproductive Health-Centers for Disease Control and Prevention (CDC). (2000) Cape Verde Reproductive Health Survey 1998. Atlanta, United States: Centers for Disease Control and Prevention (CDC)               |
| 77 | ICF International, Ministry of Public Health (Niger), National Institute of Statistics (Niger). Niger Demographic and Health Survey 2012. Fairfax, United States: ICF International, 2014                                                                                  |
| 78 | General Directorate of Statistics (Gabon), ICF International, Ministry of Economy, Employment and Sustainable Development (Gabon), Ministry of Health (Gabon). Gabon Demographic and Health Survey 2012. Fairfax, United States: ICF International, 2013                   |
| 79 | United Nations Children's Fund (UNICEF), Census Bureau (Chad), National Institute of Statistical, Economic and Demographic Studies (Chad). Chad Multiple Indicator Cluster Survey 2000. New York, United States: United Nations Children's Fund (UNICEF)                   |
| 80 | Bureau of Statistics (Lesotho), United Nations Children's Fund (UNICEF). Lesotho Multiple Indicator Cluster Survey 2000. New York, United States: United Nations Children's Fund (UNICEF)                                                                                  |
| 81 | Federal Office of Statistics (Nigeria), United Nations Children's Fund (UNICEF). Nigeria Multiple Indicator Cluster Survey 1995                                                                                                                                            |
| 82 | National Bureau of Statistics (Nigeria), United Nations Children's Fund (UNICEF). Nigeria Multiple Indicator Cluster Survey 1999. Abuja, Nigeria: National Bureau of Statistics (Nigeria)                                                                                  |
| 83 | United Nations Children's Fund (UNICEF), National Bureau of Statistics (Nigeria). Nigeria Multiple Indicator Cluster Survey 2007. New York, United States: United Nations Children's Fund (UNICEF)                                                                         |
| 84 | Census Bureau (Chad), Macro International, Inc, National Institute of Statistical, Economic and Demographic Studies (Chad). Chad Demographic and Health Survey 1996-1997. Calverton, United States: Macro International, Inc                                               |
| 85 | Macro International, Inc, National Institute of Statistical, Economic and Demographic Studies (Chad). Chad Demographic and Health Survey 2004. Calverton, United States: Macro International, Inc                                                                          |
| 86 | Bureau of Statistics (Lesotho), Macro International, Inc, Ministry of Health and Social Welfare (Lesotho). Lesotho Demographic and Health Survey 2004-2005. Calverton, United States: Macro International, Inc                                                             |
| 87 | Macro International, Inc, National Institute of Statistics (INE) (Mozambique). Mozambique Demographic and Health Survey 1997. Calverton, United States: Macro International, Inc                                                                                           |
| 88 | Macro International, Inc, National Institute of Statistics (INE) (Mozambique). Mozambique Demographic and Health Survey 2003-2004. Calverton, United States: Macro International, Inc                                                                                      |
| 89 | Federal Office of Statistics (Nigeria), Macro International, Inc.; Institute for Resource Development. Nigeria Demographic and Health Survey 1990. Calverton, United States: Macro International, Inc                                                                      |
| 90 | National Population Commission of Nigeria, ORC Macro, UK Department for International Development (DFID), United Nations Children's Fund (UNICEF), United Nations Population Fund (UNFPA). Nigeria Demographic and Health Survey 2003. Calverton, United States: ORC Macro |
| 91 | Federal Ministry of Health (Nigeria), Macro Systems, Inc.; Institute for Resource Development, National Population Bureau (Nigeria). Nigeria - Ondo Special Demographic and Health Survey 1986-1987. Columbia, United States: Macro Systems, Inc                           |
| 92 | ICF Macro, Ministry of Health and Social Welfare (Lesotho). Lesotho Demographic and Health Survey 2009-2010. Calverton, United States: ICF Macro                                                                                                                           |
| 93 | Macro International, Inc, National Population Commission of Nigeria. Nigeria Demographic and Health Survey 2008. Calverton, United States: Macro International, Inc, 2009                                                                                                  |
| 94 | Central Bank of Nigeria, National Bureau of Statistics (Nigeria), Nigerian Communications Commission (NCC). Nigeria General Household Survey 2007. Abuja, Nigeria: National Bureau of Statistics (Nigeria)                                                                 |
| 95 | Central Bank of Nigeria, National Bureau of Statistics (Nigeria), Nigerian Communications Commission (NCC). Nigeria General Household Survey 2008                                                                                                                          |

|     |                                                                                                                                                                                                                                                                                                               |
|-----|---------------------------------------------------------------------------------------------------------------------------------------------------------------------------------------------------------------------------------------------------------------------------------------------------------------|
| 96  | United Nations Children's Fund (UNICEF), National Statistics Institute (Mozambique). Mozambique Multiple Indicator Cluster Survey 2008-2009. New York, United States: United Nations Children's Fund (UNICEF)                                                                                                 |
| 97  | Mozambique National Institute of Statistics, Division of Reproductive Health-Centers for Disease Control and Prevention (CDC). (2003) Mozambique Young Adult Reproductive Health Survey 2001. Atlanta, United States: Centers for Disease Control and Prevention (CDC)                                        |
| 98  | ICF Macro, Manhica Health Research Center (CISM), Ministry of Health (Mozambique), National Institute of Statistics (INE) (Mozambique). Mozambique Demographic and Health Survey 2011. Calverton, United States: ICF Macro, 2013                                                                              |
| 99  | Ministry of Planning, Economy, and International Cooperation (Chad), National Institute of Statistical, Economic and Demographic Studies (Chad), United Nations Children's Fund (UNICEF). Chad Multiple Indicator Cluster Survey 2010. New York, United States: United Nations Children's Fund (UNICEF), 2014 |
| 100 | National Bureau of Statistics (Nigeria), United Nations Children's Fund (UNICEF). Nigeria Multiple Indicator Cluster Survey 2011. New York, United States: United Nations Children's Fund (UNICEF), 2013                                                                                                      |
| 101 | Burundi Institute of Statistics and Economic Studies, United Nations Children's Fund (UNICEF). Burundi Multiple Indicator Cluster Survey 2000. New York, United States: United Nations Children's Fund (UNICEF)                                                                                               |
| 102 | Macro International, Inc, National Institute of Statistics (Côte d'Ivoire). Côte d'Ivoire Demographic and Health Survey 1994. Calverton, United States: Macro International, Inc                                                                                                                              |
| 103 | Macro International, Inc, National Institute of Statistics (Côte d'Ivoire). Côte d'Ivoire Demographic and Health Survey 1998-1999. Calverton, United States: Macro International, Inc                                                                                                                         |
| 104 | ICF International, Ministry of the Fight Against AIDS (Côte d'Ivoire), National Institute of Statistics (Côte d'Ivoire). Côte d'Ivoire Demographic and Health Survey 2011-2012. Fairfax, United States: ICF International, 2013                                                                               |
| 105 | Population Department, Ministry of the Interior (Burundi), Westinghouse; Institute for Resource Development. Burundi Demographic and Health Survey 1987. Columbia, United States: Westinghouse; Institute for Resource Development                                                                            |
| 106 | Central Statistics Office (Namibia), Macro International, Inc, Ministry of Health and Social Services (Namibia). Namibia Demographic and Health Survey 1992. Calverton, United States: Macro International, Inc                                                                                               |
| 107 | Macro International, Inc, Ministry of Health and Social Services (Namibia), National Planning Commission (Namibia). Namibia Demographic and Health Survey 2000. Calverton, United States: Macro International, Inc                                                                                            |
| 108 | Macro International, Inc, Ministry of Health and Social Services (Namibia). Namibia Demographic and Health Survey 2006-2007. Calverton, United States: Macro International, Inc                                                                                                                               |
| 109 | Macro International, Inc, National Office of Population (Rwanda). Rwanda Demographic and Health Survey 1992. Calverton, United States: Macro International, Inc                                                                                                                                               |
| 110 | Macro International, Inc, National Office of Population (Rwanda). Rwanda Demographic and Health Survey 2000. Calverton, United States: Macro International, Inc                                                                                                                                               |
| 111 | Macro International, Inc, National Institute of Statistics of Rwanda. Rwanda Demographic and Health Survey 2005. Calverton, United States: Macro International, Inc                                                                                                                                           |
| 112 | Macro International, Inc, Ministry of Health (Rwanda), National Institute of Statistics of Rwanda. Rwanda Interim Demographic and Health Survey 2007-2008. Calverton, United States: Macro International, Inc                                                                                                 |
| 113 | United Nations Children's Fund (UNICEF), National Institute of Statistics (Côte d'Ivoire). Côte d'Ivoire Multiple Indicator Cluster Survey 2006. New York, United States: United Nations Children's Fund (UNICEF)                                                                                             |
| 114 | National School for Statistics and Economics Applied (ENSEA), United Nations Children's Fund (UNICEF), United Nations Educational, Scientific and Cultural Organization (UNESCO). Côte d'Ivoire Multiple Indicator Cluster Survey 2000. New York, United States: United Nations Children's Fund (UNICEF)      |
| 115 | ICF Macro, Ministry of Health (Sao Tome and Principe), National Institute of Statistics (Sao Tome and Principe). Sao Tome and Principe Demographic and Health Survey 2008-2009. Calverton, United States: ICF Macro                                                                                           |
| 116 | Department of Statistics (Rwanda), United Nations Children's Fund (UNICEF). Rwanda Multiple Indicator Cluster Survey 2000. New York, United States: United Nations Children's Fund (UNICEF)                                                                                                                   |
| 117 | National Institute of Statistics (Sao Tome and Principe), United Nations Children's Fund (UNICEF). Sao Tome and Principe Multiple Indicator Cluster Survey 2000. New York, United States: United Nations Children's Fund (UNICEF)                                                                             |
| 118 | Burundi Institute of Statistics and Economic Studies, ICF International, Ministry of Public Health and the Fight against AIDS (Burundi). Burundi Demographic and Health Survey 2010-2011. Fairfax, United States: ICF International, 2012                                                                     |
| 119 | ICF Macro, Ministry of Health (Rwanda), National Institute of Statistics of Rwanda. Rwanda Demographic and Health Survey 2010-2011. Calverton, United States: ICF Macro                                                                                                                                       |
| 120 | United Nations Development Programme (UNDP), United Nations Children's Fund (UNICEF). Comoros Multiple Indicator Cluster Survey 2000. New York, United States: United Nations Children's Fund (UNICEF)                                                                                                        |
| 121 | Central Statistics Department (Gambia), United Nations Children's Fund (UNICEF). Gambia Multiple Indicator Cluster Survey 2000. New York, United States: United Nations Children's Fund (UNICEF)                                                                                                              |
| 122 | Gambia Bureau of Statistics (GBOS), United Nations Children's Fund (UNICEF). Gambia Multiple Indicator Cluster Survey 2005-2006. New York, United States: United Nations Children's Fund (UNICEF)                                                                                                             |
| 123 | Macro International, Inc, National Centre of Documentation and Scientific Research (Comoros). Comoros Demographic and Health Survey 1996. Calverton, United States: Macro International, Inc                                                                                                                  |

|     |                                                                                                                                                                                                                                                                                                                                                                             |
|-----|-----------------------------------------------------------------------------------------------------------------------------------------------------------------------------------------------------------------------------------------------------------------------------------------------------------------------------------------------------------------------------|
| 124 | Department of Statistics (Senegal), Westinghouse; Institute for Resource Development. Senegal Demographic and Health Survey 1986. Columbia, United States: Westinghouse; Institute for Resource Development                                                                                                                                                                 |
| 125 | Directorate of Forecasting and Statistics, Ministry of the Economy, Finance and Planning (Senegal), Macro International, Inc. Senegal Demographic and Health Survey 1992-1993. Calverton, United States: Macro International, Inc                                                                                                                                           |
| 126 | Directorate of Forecasting and Statistics, Ministry of the Economy, Finance and Planning (Senegal), Macro International, Inc. Senegal Demographic and Health Survey 1997. Calverton, United States: Macro International, Inc                                                                                                                                                |
| 127 | Department of Health (South Africa), Macro International, Inc, South African Medical Research Council. South Africa Demographic and Health Survey 1998. Calverton, United States: Macro International, Inc                                                                                                                                                                  |
| 128 | Department of Health (South Africa), Macro International, Inc, South African Medical Research Council. South Africa Demographic and Health Survey 2003-2004                                                                                                                                                                                                                 |
| 129 | Ministry of Health and Prevention (Senegal), Research Center for Human Development (Senegal). Senegal Demographic and Health Survey 2005. Calverton, United States: Macro International, Inc                                                                                                                                                                                |
| 130 | Government of Senegal, United Nations Children's Fund (UNICEF). Senegal Multiple Indicator Cluster Survey 1996                                                                                                                                                                                                                                                              |
| 131 | Center for Research in Human Development (CRDH), Cheikh Anta Diop University, Hospital Aristide Le Dantec, ICF Macro, National Agency of Statistics and Demography (Senegal). Senegal Demographic and Health Survey 2010-2011. Calverton, United States: ICF Macro                                                                                                          |
| 132 | General Directorate of Statistics and Forecasting (Comoros), ICF International. Comoros Demographic and Health Survey 2012-2013. Fairfax, United States: ICF International, 2014                                                                                                                                                                                            |
| 133 | Gambia Bureau of Statistics (GBOS), ICF International, Ministry of Health and Social Welfare (Gambia). Gambia Demographic and Health Survey 2013. Fairfax, United States: ICF International, 2015                                                                                                                                                                           |
| 134 | Gambia Bureau of Statistics (GBOS), United Nations Children's Fund (UNICEF). Gambia Multiple Indicator Cluster Survey 2010                                                                                                                                                                                                                                                  |
| 135 | ICF International, Ministry of Health and Social Action (Senegal), National Agency of Statistics and Demography (Senegal). Senegal Continuous Demographic and Health Survey 2012-2013. Fairfax, United States: ICF International, 2014                                                                                                                                      |
| 136 | Department of Statistics and Demographic Studies (Djibouti), League of Arab States, Ministry of Health (Djibouti), Pan Arab Project for Family Health (PAPFAM). Djibouti Family Health Survey 2002                                                                                                                                                                          |
| 137 | Ministry of Economy, Finance, and Planning in charge of Privatization (Djibouti), Ministry of Health (Djibouti), United Nations Children's Fund (UNICEF). Djibouti Multiple Indicator Cluster Survey 2006. New York, United States: United Nations Children's Fund (UNICEF)                                                                                                 |
| 138 | Ministry of Health (Ghana), United Nations Children's Fund (UNICEF). Ghana Multiple Indicator Cluster Survey 1995                                                                                                                                                                                                                                                           |
| 139 | Ministry of Health (MOH) (Ghana), Ghana Statistical Service and United Nations Children's Fund (UNICEF). Ghana Multiple Indicator Cluster Survey 2006. New York, United States: United Nations Children's Fund (UNICEF)                                                                                                                                                     |
| 140 | Central Statistics Office (Sierra Leone), United Nations Children's Fund (UNICEF). Sierra Leone Multiple Indicator Cluster Survey 2000. New York, United States: United Nations Children's Fund (UNICEF)                                                                                                                                                                    |
| 141 | United Nations Children's Fund (UNICEF), Statistics Sierra Leone. Sierra Leone Multiple Indicator Cluster Survey 2005. New York, United States: United Nations Children's Fund (UNICEF)                                                                                                                                                                                     |
| 142 | Pan Arab Project for Family Health (PAPFAM), United Nations Children's Fund (UNICEF). Somalia Multiple Indicator Cluster Survey 2006. New York, United States: United Nations Children's Fund (UNICEF)                                                                                                                                                                      |
| 143 | Division of Reproductive Health-Centers for Disease Control and Prevention (CDC) and Ministry of Health. (1989) Swaziland Family Planning/Maternal and Child Health Survey 1988. Atlanta, United States: Centers for Disease Control and Prevention (CDC)                                                                                                                   |
| 144 | Central Statistical Office (Swaziland), United Nations Children's Fund (UNICEF). Swaziland Multiple Indicator Cluster Survey 2000. New York, United States: United Nations Children's Fund (UNICEF)                                                                                                                                                                         |
| 145 | Ghana Statistical Service, Macro Systems, Inc.; Institute for Resource Development. Ghana Demographic and Health Survey 1988. Columbia, United States: Macro Systems, Inc                                                                                                                                                                                                   |
| 146 | Ghana Statistical Service, Macro International, Inc. Ghana Demographic and Health Survey 1993-1994. Calverton, United States: Macro International, Inc                                                                                                                                                                                                                      |
| 147 | Ghana Statistical Service, Macro International, Inc. Ghana Demographic and Health Survey 1998-1999. Calverton, United States: Macro International, Inc                                                                                                                                                                                                                      |
| 148 | Ghana Statistical Service, Macro International, Inc. Ghana Demographic and Health Survey 2003. Calverton, United States: Macro International, Inc                                                                                                                                                                                                                           |
| 149 | Central Statistical Office (Swaziland), Macro International, Inc. Swaziland Demographic and Health Survey 2006-2007. Calverton, United States: Macro International, Inc                                                                                                                                                                                                     |
| 150 | Ghana Statistical Service, Macro International, Inc, Ministry of Health (Ghana). Ghana Demographic and Health Survey 2008. Calverton, United States: Macro International, Inc                                                                                                                                                                                               |
| 151 | Macro International, Inc, Statistics Sierra Leone. Sierra Leone Demographic and Health Survey 2008. Calverton, United States: Macro International, Inc                                                                                                                                                                                                                      |
| 152 | Central Statistical Office (Swaziland), United Nations Children's Fund (UNICEF). Swaziland Multiple Indicator Cluster Survey 2010. New York, United States: United Nations Children's Fund (UNICEF)                                                                                                                                                                         |
| 153 | Institute of Statistical, Social and Economic Research, University of Ghana, United Nations Children's Fund (UNICEF). Ghana - Accra Multiple Indicator Cluster Survey 2010-2011. New York, United States: United Nations Children's Fund (UNICEF), 2014                                                                                                                     |
| 154 | Centers for Disease Control and Prevention (CDC), Ghana Statistical Service, Government of Japan, Ministry of Health (Ghana), Navrongo Health Research Centre, USAID, United Nations Children's Fund (UNICEF), United Nations Population Fund (UNFPA). Ghana Multiple Indicator Cluster Survey 2011. New York, United States: United Nations Children's Fund (UNICEF), 2013 |
| 155 | Statistics Sierra Leone, United Nations Children's Fund (UNICEF). Sierra Leone Multiple Indicator Cluster Survey 2010. New York, United States: United Nations Children's Fund (UNICEF)                                                                                                                                                                                     |
| 156 | Ministry of National Planning and Development (Somaliland), United Nations Children's Fund (UNICEF). Somalia - Somaliland Multiple Indicator Cluster Survey 2011. New York, United States: United Nations Children's Fund (UNICEF), 2015                                                                                                                                    |

|     |                                                                                                                                                                                                                                                                                                                                            |
|-----|--------------------------------------------------------------------------------------------------------------------------------------------------------------------------------------------------------------------------------------------------------------------------------------------------------------------------------------------|
| 157 | Living Conditions Monitoring Office (Angola), National Statistics Office (Angola), United Nations Children's Fund (UNICEF). Angola Multiple Indicator Cluster Survey 1996. New York, United States: United Nations Children's Fund (UNICEF)                                                                                                |
| 158 | National Institute of Statistics (Angola), United Nations Children's Fund (UNICEF). Angola Multiple Indicator Cluster Survey 2001. New York, United States: United Nations Children's Fund (UNICEF)                                                                                                                                        |
| 159 | United Nations Children's Fund (UNICEF). Togo Multiple Indicator Cluster Survey 2000. New York, United States: United Nations Children's Fund (UNICEF)                                                                                                                                                                                     |
| 160 | Directorate General of Statistics and National Accounting (Togo), United Nations Children's Fund (UNICEF). Togo Multiple Indicator Cluster Survey 2006. New York, United States: United Nations Children's Fund (UNICEF)                                                                                                                   |
| 161 | Macro International, Inc, National Statistics and Evaluation Office (Eritrea). Eritrea Demographic and Health Survey 2002. Calverton, United States: Macro International, Inc                                                                                                                                                              |
| 162 | Macro International, Inc, National Statistics Office (Eritrea). Eritrea Demographic and Health Survey 1995-1996. Calverton, United States: Macro International, Inc                                                                                                                                                                        |
| 163 | Macro International, Inc, National Statistics Directorate (Guinea). Guinea Demographic and Health Survey 1992                                                                                                                                                                                                                              |
| 164 | Macro International, Inc, National Statistics Directorate (Guinea). Guinea Demographic and Health Survey 1999. Calverton, United States: Macro International, Inc                                                                                                                                                                          |
| 165 | Macro International, Inc, National Statistics Directorate (Guinea). Guinea Demographic and Health Survey 2005. Calverton, United States: Macro International, Inc                                                                                                                                                                          |
| 166 | Demographic Research Unit, University of Lomé (Togo), Department of Statistics (Togo), Macro Systems, Inc.; Institute for Resource Development, Ministry of Public Health, Social Affairs and the Status of Women (Togo). Togo Demographic and Health Survey 1988. Columbia, United States: Macro Systems, Inc                             |
| 167 | Department of Statistics (Togo), Macro International, Inc. Togo Demographic and Health Survey 1998. Calverton, United States: Macro International, Inc                                                                                                                                                                                     |
| 168 | Central Statistical Office (Zimbabwe), Macro Systems, Inc.; Institute for Resource Development. Zimbabwe Demographic and Health Survey 1988-1989. Columbia, United States: Macro Systems, Inc.;                                                                                                                                            |
| 169 | Central Statistical Office (Zimbabwe), Macro International, Inc. Zimbabwe Demographic and Health Survey 1994. Calverton, United States: Macro International, Inc                                                                                                                                                                           |
| 170 | Central Statistical Office (Zimbabwe), Macro International, Inc. Zimbabwe Demographic and Health Survey 1999. Calverton, United States: Macro International, Inc                                                                                                                                                                           |
| 171 | Central Statistical Office (Zimbabwe), Macro International, Inc. Zimbabwe Demographic and Health Survey 2005-2006. Calverton, United States: Macro International, Inc                                                                                                                                                                      |
| 172 | Central Statistical Office (Zimbabwe). Zimbabwe Multiple Indicator Monitoring Survey 2009. New York, United States: United Nations Children's Fund (UNICEF)                                                                                                                                                                                |
| 173 | Directorate General of Statistics and National Accounting (Togo), United Nations Children's Fund (UNICEF). Togo Multiple Indicator Cluster Survey 2010. New York, United States: United Nations Children's Fund (UNICEF)                                                                                                                   |
| 174 | ICF Macro, Zimbabwe National Statistics Agency. Zimbabwe Demographic and Health Survey 2010-2011. Calverton, United States: ICF Macro, 2012                                                                                                                                                                                                |
| 175 | ICF Macro, Ministry of Health and Public Hygiene (Guinea), National Institute of Statistics (Guinea). Guinea Demographic and Health Survey 2012. Calverton, United States: ICF Macro, 2014                                                                                                                                                 |
| 176 | Division of Statistics and Economic Studies (Central African Republic), Ministry of Economy, Planning and International Cooperation (Central African Republic), United Nations Children's Fund (UNICEF). Central African Republic Multiple Indicator Cluster Survey 2000. New York, United States: United Nations Children's Fund (UNICEF) |
| 177 | United Nations Children's Fund (UNICEF). Central African Republic Multiple Indicator Cluster Survey 2006. New York, United States: United Nations Children's Fund (UNICEF)                                                                                                                                                                 |
| 178 | Secretary State of Planning, National Institute of Statistics and Census (INEC), United Nations Children's Fund (UNICEF). Guinea-Bissau Multiple Indicator Cluster Survey 2000. New York, United States: United Nations Children's Fund (UNICEF)                                                                                           |
| 179 | United Nations Children's Fund (UNICEF), Government of Guinea-Bissau. Guinea-Bissau Multiple Indicator Cluster Survey 2006. New York, United States: United Nations Children's Fund (UNICEF)                                                                                                                                               |
| 180 | Division of Statistics and Economic Studies (Central African Republic), Macro International, Inc. Central African Republic Demographic and Health Survey 1994-1995. Calverton, United States: Macro International, Inc                                                                                                                     |
| 181 | Macro International, Inc, Population and Housing Census Commissions Office (PHCCO). Ethiopia Demographic and Health Survey 2005. Calverton, United States: Macro International, Inc                                                                                                                                                        |
| 182 | Central Statistical Agency (Ethiopia), ORC Macro. Ethiopia Demographic and Health Survey 2000. Calverton, United States: ORC Macro, 2001                                                                                                                                                                                                   |
| 183 | Bureau of Statistics (Tanzania), Macro International, Inc, Ministry of Health (Tanzania). Tanzania Demographic and Health Survey 1991-1992. Calverton, United States: Macro International, Inc                                                                                                                                             |
| 184 | Bureau of Statistics (Tanzania), Macro International, Inc, Planning Commission (Tanzania). Tanzania Demographic and Health Survey 1996. Calverton, United States: Macro International, Inc                                                                                                                                                 |
| 185 | Bureau of Statistics (Tanzania), Macro International, Inc. Tanzania Demographic and Health Survey 1999. Calverton, United States: Macro International, Inc                                                                                                                                                                                 |
| 186 | Macro International, Inc, National Bureau of Statistics (Tanzania). Tanzania Demographic and Health Survey 2004-2005. Calverton, United States: Macro International, Inc                                                                                                                                                                   |
| 187 | Central Statistical Agency (Ethiopia), ICF Macro, Ministry of Health (Ethiopia). Ethiopia Demographic and Health Survey 2010-2011. Calverton, United States: ICF Macro                                                                                                                                                                     |
| 188 | ICF Macro, National Bureau of Statistics (Tanzania). Tanzania Demographic and Health Survey 2009-2010. Calverton, United States: ICF Macro                                                                                                                                                                                                 |
| 189 | Centers for Disease Control and Prevention (CDC), National Statistics Institute (Guinea-Bissau), United Nations Children's Fund (UNICEF). Guinea-Bissau Multiple Indicator Cluster Survey 2010                                                                                                                                             |
| 190 | Central African Institute of Statistics, Economic and Social Studies (ICASEES) (Central African Republic), ICF International. Central African Republic Multiple Indicator Cluster Survey 2010-2011. Fairfax, United States: ICF International, 2013                                                                                        |
| 191 | Uganda Bureau of Statistics. Uganda Living Standards Measurement Survey - Integrated Survey on Agriculture 2009-2010. Washington DC, United States: World Bank                                                                                                                                                                             |
| 192 | Kenya National Bureau of Statistics, United Nations Children's Fund (UNICEF). Kenya - Nyanza Province Multiple Indicator Cluster Survey 2011. Nairobi, Kenya: Kenya National Bureau of Statistics                                                                                                                                          |
| 193 | Kenya Integrated Household Budget Survey 2005-2006 as it appears in World Health Organization (WHO). WHO Global Database on Child Growth and Malnutrition. Geneva, Switzerland: World Health Organization (WHO)                                                                                                                            |



|     |                                                                                                                                                                                                                                                                                                                                  |
|-----|----------------------------------------------------------------------------------------------------------------------------------------------------------------------------------------------------------------------------------------------------------------------------------------------------------------------------------|
| 194 | Kenya Welfare Monitoring Survey II 1994 as it appears in World Health Organization (WHO). WHO Global Database on Child Growth and Malnutrition. Geneva, Switzerland: World Health Organization (WHO)                                                                                                                             |
| 195 | Liberia National Nutrition Survey 1999-2000 as it appears in World Health Organization (WHO). WHO Global Database on Child Growth and Malnutrition. Geneva, Switzerland: World Health Organization (WHO)                                                                                                                         |
| 196 | Kenya National Bureau of Statistics, United Nations Children's Fund (UNICEF). Kenya - North Eastern Province Multiple Indicator Cluster Survey 2007. Nairobi, Kenya: Kenya National Bureau of Statistics                                                                                                                         |
| 197 | ICF International, Kenya Medical Research Institute (KEMRI), Kenya National Bureau of Statistics, Ministry of Health (Kenya), National AIDS Control Council (Kenya), National Council for Population and Development (Kenya). Kenya Demographic and Health Survey 2014. Fairfax, United States: ICF International, 2015          |
| 198 | Kenya National Bureau of Statistics, Population Studies and Research Institute, University of Nairobi (Kenya), United Nations Children's Fund (UNICEF). Kenya - Bungoma County Multiple Indicator Survey 2013-2014. New York, United States: United Nations Children's Fund (UNICEF), 2015                                       |
| 199 | Kenya National Bureau of Statistics, Population Studies and Research Institute, University of Nairobi (Kenya), United Nations Children's Fund (UNICEF). Kenya - Kakamega County Multiple Indicator Survey 2013-2014. New York, United States: United Nations Children's Fund (UNICEF), 2015                                      |
| 200 | Kenya National Bureau of Statistics, Population Studies and Research Institute, University of Nairobi (Kenya), United Nations Children's Fund (UNICEF). Kenya - Turkana County Multiple Indicator Survey 2013-2014. New York, United States: United Nations Children's Fund (UNICEF), 2015                                       |
| 201 | United Nations Children's Fund (UNICEF). Zaire Multiple Indicator Cluster Survey 1995. New York, United States: United Nations Children's Fund (UNICEF)                                                                                                                                                                          |
| 202 | Central Statistical Office (Zambia). Zambia Living Conditions Monitoring Survey 1996. Lusaka, Zambia: Central Statistical Office (Zambia)                                                                                                                                                                                        |
| 203 | Central Statistical Office (Zambia). Zambia Living Conditions Monitoring Survey 2006                                                                                                                                                                                                                                             |
| 204 | National Statistical Institute (Congo, DR), Ministry of Planning (Congo, DR), United Nations Children's Fund (UNICEF). Congo, DR Multiple Indicator Cluster Survey 2010. New York, United States: United Nations Children's Fund (UNICEF)                                                                                        |
| 205 | ICF International, Ministry of Planning and Monitoring Implementation of the Revolution of Modernity (Congo, DR), Ministry of Public Health (Congo, DR), National Institute of Statistics (Congo, DR). Democratic Republic of the Congo Demographic and Health Survey 2013-2014. Fairfax, United States: ICF International, 2014 |
| 206 | Central Statistical Office (Zambia), ICF International, Ministry of Health (Zambia), Tropical Diseases Research Centre, University Teaching Hospital (Zambia), University of Zambia. Zambia Demographic and Health Survey 2013-2014. Fairfax, United States: ICF International, 2015                                             |
| 207 | Madagascar Multiple Indicator Cluster Survey 1995 as it appears in World Health Organization (WHO). WHO Global Database on Child Growth and Malnutrition. Geneva, Switzerland: World Health Organization (WHO)                                                                                                                   |
| 208 | Madagascar Permanent Household Survey 1993-1994 as it appears in World Health Organization (WHO). WHO Global Database on Child Growth and Malnutrition. Geneva, Switzerland: World Health Organization (WHO)                                                                                                                     |
| 209 | Mali Multiple Indicator Cluster Survey 1996 as it appears in World Health Organization (WHO). WHO Global Database on Child Growth and Malnutrition. Geneva, Switzerland: World Health Organization (WHO)                                                                                                                         |
| 210 | Burkina Faso National Nutrition Survey 2009 as it appears in World Health Organization (WHO). WHO Global Database on Child Growth and Malnutrition. Geneva, Switzerland: World Health Organization (WHO)                                                                                                                         |
| 211 | Study of the Epidemiology of Breastfeeding in Madagascar as it appears in World Health Organization (WHO). WHO Global Database on Child Growth and Malnutrition. Geneva, Switzerland: World Health Organization (WHO)                                                                                                            |
| 212 | Burkina Faso Core Welfare Indicators Questionnaire Survey 2007 as it appears in United Nations Children's Fund (UNICEF). UNICEF Childinfo - Nutritional Status. New York, United States: United Nations Children's Fund (UNICEF)                                                                                                 |
| 213 | National Office of Statistics (Mauritania), League of Arab States. Mauritania Maternal and Child Health Survey 1990-1991                                                                                                                                                                                                         |
| 214 | Macro International, Inc, National Office of Statistics (Mauritania). Mauritania Demographic and Health Survey 2000-2001. Calverton, United States: Macro International, Inc                                                                                                                                                     |
| 215 | National Statistical Office of Malawi, World Bank. Malawi Integrated Household Survey 2010-2011. Washington DC, United States: World Bank                                                                                                                                                                                        |
| 216 | Malawi Integrated Household Survey 1997-1999 as it appears in World Health Organization (WHO). WHO Global Database on Child Growth and Malnutrition. Geneva, Switzerland: World Health Organization (WHO)                                                                                                                        |
| 217 | Mauritania Multiple Indicator Cluster Survey 1996 as it appears in World Health Organization (WHO). WHO Global Database on Child Growth and Malnutrition. Geneva, Switzerland: World Health Organization (WHO)                                                                                                                   |
| 218 | Malawi National Sample Survey of Agriculture 1980-1981 as it appears in World Health Organization (WHO). WHO Global Database on Child Growth and Malnutrition. Geneva, Switzerland: World Health Organization (WHO)                                                                                                              |
| 219 | Malawi Micronutrient Survey 2009 as it appears in World Health Organization (WHO). WHO Global Database on Child Growth and Malnutrition. Geneva, Switzerland: World Health Organization (WHO)                                                                                                                                    |
| 220 | Mauritania National Quick Survey on Nutrition and Child Survival as it appears in World Health Organization (WHO). WHO Global Database on Child Growth and Malnutrition. Geneva, Switzerland: World Health Organization (WHO)                                                                                                    |

|     |                                                                                                                                                                                                                                                                                                                                                                                                                                                             |
|-----|-------------------------------------------------------------------------------------------------------------------------------------------------------------------------------------------------------------------------------------------------------------------------------------------------------------------------------------------------------------------------------------------------------------------------------------------------------------|
| 221 | Custodio E, Descalzo MA, Roche J, Molina L, Sánchez I, Lwanga M, Torres AM, Fernández-Zincke E, Bernis C, Villamor E, Baylin A. The economic and nutrition transition in Equatorial Guinea coincided with a double burden of over- and under nutrition. <i>Econ Hum Biol.</i> 2010; 8(1): 80-7 as it appears in World Health Organization (WHO). WHO Global Database on Child Growth and Malnutrition. Geneva, Switzerland: World Health Organization (WHO) |
| 222 | Custodio E, Descalzo MA, Roche J, Sánchez I, Molina L, Lwanga M, Bernis C, Villamor E, Baylin A. Nutritional status and its correlates in Equatorial Guinean preschool children: results from a nationally representative survey. <i>Food Nutr Bull.</i> 2008; 29(1): 49-58 as it appears in World Health Organization (WHO). WHO Global Database on Child Growth and Malnutrition. Geneva, Switzerland: World Health Organization (WHO)                    |
| 223 | National Statistical Office of Malawi, United Nations Children's Fund (UNICEF). Malawi Multiple Indicator Cluster Survey 2013-2014. New York, United States: United Nations Children's Fund (UNICEF), 2015                                                                                                                                                                                                                                                  |
| 224 | National Statistical Office of Malawi. Malawi Integrated Household Panel Survey 2013. Washington DC, United States: World Bank, 2015                                                                                                                                                                                                                                                                                                                        |
| 225 | Niger National Survey on Morbidity and Mortality 1985 as it appears in World Health Organization (WHO). WHO Global Database on Child Growth and Malnutrition. Geneva, Switzerland: World Health Organization (WHO)                                                                                                                                                                                                                                          |
| 226 | Health of Children Under Five Years of Age in Cape Verde as it appears in World Health Organization (WHO). WHO Global Database on Child Growth and Malnutrition. Geneva, Switzerland: World Health Organization (WHO)                                                                                                                                                                                                                                       |
| 227 | Wennberg A. Anthropometric assessment of the nutritional status of preschool-age children in Cape Verde. <i>Bull World Health Organ.</i> 1988; 66(3): 375-86 as it appears in World Health Organization (WHO). WHO Global Database on Child Growth and Malnutrition. Geneva, Switzerland: World Health Organization (WHO)                                                                                                                                   |
| 228 | Reitmaier P, Dupret A, Cutting WA. Better health data with a portable microcomputer at the periphery: an anthropometric survey in Cape Verde. <i>Bull World Health Organ.</i> 1987; 65(5): 651-7 as it appears in World Health Organization (WHO). WHO Global Database on Child Growth and Malnutrition. Geneva, Switzerland: World Health Organization (WHO)                                                                                               |
| 229 | Cape Verde Core Welfare Indicator Questionnaire Survey 2006 as it appears in United Nations Children's Fund (UNICEF). UNICEF Childinfo - Nutritional Status. New York, United States: United Nations Children's Fund (UNICEF)                                                                                                                                                                                                                               |
| 230 | Niger Nutrition and Child Survival Survey 2008 as it appears in United Nations Children's Fund (UNICEF). UNICEF Childinfo - Nutritional Status. New York, United States: United Nations Children's Fund (UNICEF)                                                                                                                                                                                                                                            |
| 231 | Ministry of Health (Mozambique), National Institute of Statistics (INE) (Mozambique), United Nations Children's Fund (UNICEF). Mozambique Multiple Indicator Cluster Survey 1995                                                                                                                                                                                                                                                                            |
| 232 | Macro International, Inc, National Population Commission of Nigeria. Nigeria Demographic and Health Survey 1999. Calverton, United States: Macro International, Inc                                                                                                                                                                                                                                                                                         |
| 233 | ICF International, National Population Commission of Nigeria. Nigeria Demographic and Health Survey 2013. Fairfax, United States: ICF International, 2014                                                                                                                                                                                                                                                                                                   |
| 234 | Mozambique Core Welfare Indicators Questionnaire Survey 2000-2001 as it appears in World Health Organization (WHO). WHO Global Database on Child Growth and Malnutrition. Geneva, Switzerland: World Health Organization (WHO)                                                                                                                                                                                                                              |
| 235 | Lesotho National Micronutrient Survey 1993 as it appears in World Health Organization (WHO). WHO Global Database on Child Growth and Malnutrition. Geneva, Switzerland: World Health Organization (WHO)                                                                                                                                                                                                                                                     |
| 236 | Nigeria National Micronutrient Survey 1993 as it appears in World Health Organization (WHO). WHO Global Database on Child Growth and Malnutrition. Geneva, Switzerland: World Health Organization (WHO)                                                                                                                                                                                                                                                     |
| 237 | Lesotho National Nutrition Survey 1992 as it appears in World Health Organization (WHO). WHO Global Database on Child Growth and Malnutrition. Geneva, Switzerland: World Health Organization (WHO)                                                                                                                                                                                                                                                         |
| 238 | Nigeria Food Consumption and Nutrition Survey 2001-2003 as it appears in World Health Organization (WHO). WHO Global Database on Child Growth and Malnutrition - Historical. Geneva, Switzerland: World Health Organization (WHO)                                                                                                                                                                                                                           |
| 239 | Lesotho Multiple Indicator Cluster Survey 1996 as it appears in World Health Organization (WHO). WHO Global Database on Child Growth and Malnutrition - Historical. Geneva, Switzerland: World Health Organization (WHO)                                                                                                                                                                                                                                    |
| 240 | Lesotho National Nutrition Survey 2007 as it appears in United Nations Children's Fund (UNICEF). UNICEF Childinfo - Nutritional Status. New York, United States: United Nations Children's Fund (UNICEF)                                                                                                                                                                                                                                                    |
| 241 | National Bureau of Statistics (Nigeria). Nigeria General Household Survey 2012-2013. Washington DC, United States: World Bank                                                                                                                                                                                                                                                                                                                               |
| 242 | National Bureau of Statistics (Nigeria). Nigeria General Household Survey 2010-2011. Abuja, Nigeria: National Bureau of Statistics (Nigeria)                                                                                                                                                                                                                                                                                                                |
| 243 | ICF International, Ministry of Health and Social Welfare (Lesotho). Lesotho Demographic and Health Survey 2014. Fairfax, United States: ICF International, 2016                                                                                                                                                                                                                                                                                             |
| 244 | National Institute of Statistics (Sao Tome and Principe), United Nations Children's Fund (UNICEF). Sao Tome and Principe Multiple Indicator Cluster Survey 2006. New York, United States: United Nations Children's Fund (UNICEF)                                                                                                                                                                                                                           |
| 245 | United Nations Children's Fund (UNICEF). South Sudan Multiple Indicator Cluster Survey 1999. New York, United States: United Nations Children's Fund (UNICEF)                                                                                                                                                                                                                                                                                               |
| 246 | Central Bureau of Statistics (Sudan), Federal Ministry of Health (Sudan), Government of Sudan, Ministry of Health (South Sudan), Southern Sudan Centre for Census, Statistics and Evaluation. Sudan - South Multiple Indicator Cluster Survey 2010. New York, United States: United Nations Children's Fund (UNICEF), 2015                                                                                                                                  |

|     |                                                                                                                                                                                                                                                                                                                                                                                                     |
|-----|-----------------------------------------------------------------------------------------------------------------------------------------------------------------------------------------------------------------------------------------------------------------------------------------------------------------------------------------------------------------------------------------------------|
| 247 | Burundi National Nutrition Survey 2005 as it appears in World Health Organization (WHO). WHO Global Database on Child Growth and Malnutrition. Geneva, Switzerland: World Health Organization (WHO)                                                                                                                                                                                                 |
| 248 | Malnutrition in Côte d'Ivoire: Prevalence and Determinants as it appears in World Health Organization (WHO). WHO Global Database on Child Growth and Malnutrition. Geneva, Switzerland: World Health Organization (WHO)                                                                                                                                                                             |
| 249 | Evaluation of Vitamin A and Iron Deficiencies in Côte d'Ivoire: Final Report as it appears in World Health Organization (WHO). WHO Global Database on Child Growth and Malnutrition. Geneva, Switzerland: World Health Organization (WHO)                                                                                                                                                           |
| 250 | Sao Tome and Principe Nutritional Status and Immunization Coverage of Children Under 5 as it appears in World Health Organization (WHO). WHO Global Database on Child Growth and Malnutrition. Geneva, Switzerland: World Health Organization (WHO)                                                                                                                                                 |
| 251 | ICF International, Ministry of Health and Social Services (Namibia), Namibia Institute of Pathology, Namibia Statistics Agency. Namibia Demographic and Health Survey 2013. Fairfax, United States: ICF International, 2015                                                                                                                                                                         |
| 252 | ICF International, Ministry of Health (Rwanda), National Institute of Statistics of Rwanda. Rwanda Demographic and Health Survey 2014-2015. Fairfax, United States: ICF International, 2016                                                                                                                                                                                                         |
| 253 | Directorate of Forecasting and Statistics, Ministry of the Economy, Finance and Planning (Senegal), Ministry of Economy and Finance (Senegal), United Nations Children's Fund (UNICEF). Senegal Multiple Indicator Cluster Survey 2000. New York, United States: United Nations Children's Fund (UNICEF)                                                                                            |
| 254 | South Africa National Income Dynamics Study - Wave 1 2008 as it appears in World Health Organization (WHO). WHO Global Database on Child Growth and Malnutrition. Geneva, Switzerland: World Health Organization (WHO)                                                                                                                                                                              |
| 255 | South Africa Anthropometric, Vitamin A, Iron and Immunisation Coverage Status in Children Aged 6 to 71 Months 1994 as it appears in World Health Organization (WHO). WHO Global Database on Child Growth and Malnutrition. Geneva, Switzerland: World Health Organization (WHO)                                                                                                                     |
| 256 | Senegal Social Dimensions of Adjustment Household Priority Survey 1991-1992 as it appears in World Health Organization (WHO). WHO Global Database on Child Growth and Malnutrition. Geneva, Switzerland: World Health Organization (WHO)                                                                                                                                                            |
| 257 | Comoros Report on the Nutritional Status and the Factors Involved in Children Less Than Two Years Old 1991 as it appears in World Health Organization (WHO). WHO Global Database on Child Growth and Malnutrition. Geneva, Switzerland: World Health Organization (WHO)                                                                                                                             |
| 258 | Gambia Multiple Indicator Cluster Survey 1996 as it appears in World Health Organization (WHO). WHO Global Database on Child Growth and Malnutrition. Geneva, Switzerland: World Health Organization (WHO)                                                                                                                                                                                          |
| 259 | Labadarios D, Steyn NP, Maunder E, MacIntyre U, Gericke G, Swart R, Huskisson J, Dannhauser A, Vorster HH, Nesmuni AE, Nel JH. The National Food Consumption Survey (NFCS): South Africa, 1999. Public Health Nutr. 2005; 8(5): 533-43 as it appears in World Health Organization (WHO). WHO Global Database on Child Growth and Malnutrition. Geneva, Switzerland: World Health Organization (WHO) |
| 260 | Comoros Integrated Household Survey 2004 as it appears in United Nations Children's Fund (UNICEF). UNICEF Childinfo - Nutritional Status. New York, United States: United Nations Children's Fund (UNICEF)                                                                                                                                                                                          |
| 261 | Cheikh Anta Diop University, ICF International, National Agency of Statistics and Demography (Senegal). Senegal Continuous Demographic and Health Survey 2014. Fairfax, United States: ICF International, 2015                                                                                                                                                                                      |
| 262 | United Nations Children's Fund (UNICEF). Somalia Multiple Indicator Cluster Survey 1999                                                                                                                                                                                                                                                                                                             |
| 263 | ICF International, Ministry of Health and Sanitation (Sierra Leone), Statistics Sierra Leone. Sierra Leone Demographic and Health Survey 2013. Fairfax, United States: ICF International, 2014                                                                                                                                                                                                      |
| 264 | Djibouti Household Survey - Social Indicators 1996 as it appears in World Health Organization (WHO). WHO Global Database on Child Growth and Malnutrition. Geneva, Switzerland: World Health Organization (WHO)                                                                                                                                                                                     |
| 265 | Sierra Leone National Nutrition Survey 1989 as it appears in World Health Organization (WHO). WHO Global Database on Child Growth and Malnutrition. Geneva, Switzerland: World Health Organization (WHO)                                                                                                                                                                                            |
| 266 | Swaziland National Nutrition Survey 2008 as it appears in World Health Organization (WHO). WHO Global Database on Child Growth and Malnutrition. Geneva, Switzerland: World Health Organization (WHO)                                                                                                                                                                                               |
| 267 | Djibouti Immunization Coverage and Malnutrition Survey 1989-1990 as it appears in World Health Organization (WHO). WHO Global Database on Child Growth and Malnutrition. Geneva, Switzerland: World Health Organization (WHO)                                                                                                                                                                       |
| 268 | Nutritional Status in Ghana and its Determinants as it appears in World Health Organization (WHO). WHO Global Database on Child Growth and Malnutrition. Geneva, Switzerland: World Health Organization (WHO)                                                                                                                                                                                       |
| 269 | Serdula MK, Aphae JM, Kunene PF, Gama DM, Staehling N, Peck R, Seward J, Sullivan B, Trowbridge FL. Acute and chronic undernutrition in Swaziland. J Trop Pediatr. 1987; 33(1): 35-42 as it appears in World Health Organization (WHO). WHO Global Database on Child Growth and Malnutrition. Geneva, Switzerland: World Health Organization (WHO)                                                  |
| 270 | Survey Report on the Nutritional Status of Children Aged 6 to 59 Months in the Republic of Djibouti as it appears in United Nations Children's Fund (UNICEF). UNICEF Childinfo - Nutritional Status. New York, United States: United Nations Children's Fund (UNICEF)                                                                                                                               |
| 271 | Ghana Health Service, Ghana Statistical Service, ICF International. Ghana Demographic and Health Survey 2014. Fairfax, United States: ICF International, 2015                                                                                                                                                                                                                                       |

|     |                                                                                                                                                                                                                                                                                                                                      |
|-----|--------------------------------------------------------------------------------------------------------------------------------------------------------------------------------------------------------------------------------------------------------------------------------------------------------------------------------------|
| 272 | Directorate General of Statistics and National Accounts (Togo), ICF International, Ministry of Health (Togo). Togo Demographic and Health Survey 2013-2014. Fairfax, United States: ICF International, 2015                                                                                                                          |
| 273 | Guinea Household Living Conditions Survey 1994-1995 as it appears in World Health Organization (WHO). WHO Global Database on Child Growth and Malnutrition. Geneva, Switzerland: World Health Organization (WHO)                                                                                                                     |
| 274 | Angola Investigation Report on Nutrition 2007 as it appears in World Health Organization (WHO). WHO Global Database on Child Growth and Malnutrition. Geneva, Switzerland: World Health Organization (WHO)                                                                                                                           |
| 275 | Children and Women in Eritrea: 1994 as it appears in World Health Organization (WHO). WHO Global Database on Child Growth and Malnutrition. Geneva, Switzerland: World Health Organization (WHO)                                                                                                                                     |
| 276 | Togo National Survey of Nutrition and Survival of Children Aged 0 to 59 Months 2008 as it appears in World Health Organization (WHO). WHO Global Database on Child Growth and Malnutrition. Geneva, Switzerland: World Health Organization (WHO)                                                                                     |
| 277 | Guinea National Survey of Iron Deficiency Anemia 2000 as it appears in World Health Organization (WHO). WHO Global Database on Child Growth and Malnutrition. Geneva, Switzerland: World Health Organization (WHO)                                                                                                                   |
| 278 | Guinea National Survey on Nutritional Status and Tracking Key Indicators of Child Survival 2007-2008 as it appears in World Health Organization (WHO). WHO Global Database on Child Growth and Malnutrition. Geneva, Switzerland: World Health Organization (WHO)                                                                    |
| 279 | Zimbabwe National Health Information System Nutrition Component Report 1987 as it appears in World Health Organization (WHO). WHO Global Database on Child Growth and Malnutrition. Geneva, Switzerland: World Health Organization (WHO)                                                                                             |
| 280 | Togo National Policy on Food and Nutrition Synthesis Document as it appears in World Health Organization (WHO). WHO Global Database on Child Growth and Malnutrition. Geneva, Switzerland: World Health Organization (WHO)                                                                                                           |
| 281 | United Nations Children's Fund (UNICEF), Zimbabwe National Statistics Agency. Zimbabwe Multiple Indicator Cluster Survey 2014. New York, United States: United Nations Children's Fund (UNICEF), 2015                                                                                                                                |
| 282 | Economic Development Initiatives (EDI), Muhimbili University of Health and Allied Sciences (Tanzania), Rockwool Foundation Research Unit. Tanzania - Kagera Living Standards Measurement Study 2010. Washington DC, United States: World Bank                                                                                        |
| 283 | Central Statistical Agency (Ethiopia), World Bank. Ethiopia Rural Socioeconomic Survey 2011-2012. Washington DC, United States: World Bank                                                                                                                                                                                           |
| 284 | Central African Republic Nutrition Survey 1995 as it appears in World Health Organization (WHO). WHO Global Database on Child Growth and Malnutrition. Geneva, Switzerland: World Health Organization (WHO)                                                                                                                          |
| 285 | Guinea-Bissau SMART Nutrition Survey 2008 as it appears in World Health Organization (WHO). WHO Global Database on Child Growth and Malnutrition. Geneva, Switzerland: World Health Organization (WHO)                                                                                                                               |
| 286 | Benin National Survey on Vitamin A and Availability of Iodized Salt in Households 2000 as it appears in World Health Organization (WHO). WHO Global Database on Vitamin A Deficiency. Geneva, Switzerland: World Health Organization (WHO)                                                                                           |
| 287 | Liberia National Micronutrients Survey 1999 as it appears in World Health Organization (WHO). WHO Global Database on Vitamin A Deficiency. Geneva, Switzerland: World Health Organization (WHO)                                                                                                                                      |
| 288 | Samba C, Tchibindat F, Houze P, Gourmel B, Malvy D. Prevalence of infant Vitamin A deficiency and undernutrition in the Republic of Congo. Addict Behav Rep. 2006; 97(3): 270-83 as it appears in World Health Organization (WHO). WHO Global Database on Vitamin A Deficiency. Geneva, Switzerland: World Health Organization (WHO) |
| 289 | Ngare DK, Muttunga JN, Njonge E. Vitamin A deficiency in pre-school children in Kenya. East Afr Med J. 2000; 77(8): 421-4 as it appears in World Health Organization (WHO). WHO Global Database on Vitamin A Deficiency. Geneva, Switzerland: World Health Organization (WHO)                                                        |
| 290 | Samba C, Gourmel B, Houze P, Malvy D. Assessment of vitamin A status of preschool children in a sub-Saharan African setting: comparative advantage of modified relative-dose response test. J Health Popul Nutr. 2010; 28(5): 484-93                                                                                                 |
| 291 | Zambia National Vitamin A Survey 2003 as it appears in World Health Organization (WHO). WHO Global Database on Vitamin A Deficiency. Geneva, Switzerland: World Health Organization (WHO)                                                                                                                                            |
| 292 | Zambia National Survey on Vitamin A Deficiency 1997 as it appears in World Health Organization (WHO). WHO Global Database on Vitamin A Deficiency. Geneva, Switzerland: World Health Organization (WHO)                                                                                                                              |
| 293 | Democratic Republic of the Congo - Significance of Vitamin A Deficiency in the Democratic Republic of the Congo as it appears in World Health Organization (WHO). WHO Global Database on Vitamin A Deficiency. Geneva, Switzerland: World Health Organization (WHO)                                                                  |
| 294 | Madagascar Survey on Vitamin A Deficiency in Women and Children and Survey of Anemia in Schoolchildren from 6-14 Years 2000 as it appears in World Health Organization (WHO). WHO Global Database on Vitamin A Deficiency. Geneva, Switzerland: World Health Organization (WHO)                                                      |
| 295 | Cameroon National Survey on Vitamin A Deficiency and Anemia 2000 as it appears in World Health Organization (WHO). WHO Global Database on Vitamin A Deficiency. Geneva, Switzerland: World Health Organization (WHO)                                                                                                                 |

|     |                                                                                                                                                                                                                                                                                                                                                                                                                                                                                                                                |
|-----|--------------------------------------------------------------------------------------------------------------------------------------------------------------------------------------------------------------------------------------------------------------------------------------------------------------------------------------------------------------------------------------------------------------------------------------------------------------------------------------------------------------------------------|
| 296 | Malawi National Micronutrient Survey 2001 as it appears in World Health Organization (WHO). WHO Global Database on Vitamin A Deficiency. Geneva, Switzerland: World Health Organization (WHO)                                                                                                                                                                                                                                                                                                                                  |
| 297 | Wilson MR, Mansour M, Atud AE, Casey R, Fobi G, Moukouri E, Alemayehu W, Martone JF, Ross-Degnan D. A population-based study of xerophthalmia in the extreme North Province of Cameroon, West Africa. Arch Ophthalmol. 1996; 114(4): 464-8 as it appears in World Health Organization (WHO). WHO Global Database on Vitamin A Deficiency. Geneva, Switzerland: World Health Organization (WHO)                                                                                                                                 |
| 298 | Botswana Micronutrient Malnutrition Survey 1994 as it appears in World Health Organization (WHO). WHO Global Database on Vitamin A Deficiency. Geneva, Switzerland: World Health Organization (WHO)                                                                                                                                                                                                                                                                                                                            |
| 299 | Cape Verde Characterization of Vitamin A Deficiency and Anemia in Preschool Children 1996 as it appears in World Health Organization (WHO). WHO Global Database on Vitamin A Deficiency. Geneva, Switzerland: World Health Organization (WHO)                                                                                                                                                                                                                                                                                  |
| 300 | Mozambique Survey on Vitamin A Deficiency and Prevalence of Anemia and Malaria 2001-2002 as it appears in World Health Organization (WHO). WHO Global Database on Vitamin A Deficiency. Geneva, Switzerland: World Health Organization (WHO)                                                                                                                                                                                                                                                                                   |
| 301 | World Health Organization (WHO). WHO Global Database on Vitamin A Deficiency. Geneva, Switzerland: World Health Organization (WHO)                                                                                                                                                                                                                                                                                                                                                                                             |
| 302 | Rwanda National Nutrition Survey of Women and Children 1996 as it appears in World Health Organization (WHO). WHO Global Database on Vitamin A Deficiency. Geneva, Switzerland: World Health Organization (WHO)                                                                                                                                                                                                                                                                                                                |
| 303 | Namibia Iodine Deficiency Disorders Prevalence Survey 1992 as it appears in World Health Organization (WHO). WHO Global Database on Vitamin A Deficiency. Geneva, Switzerland: World Health Organization (WHO)                                                                                                                                                                                                                                                                                                                 |
| 304 | Gambia Nationwide Survey on the Prevalence of Vitamin A and Iron Deficiency in Women and Children 2001 as it appears in World Health Organization (WHO). WHO Global Database on Vitamin A Deficiency. Geneva, Switzerland: World Health Organization (WHO)                                                                                                                                                                                                                                                                     |
| 305 | Ghana - Proceedings of the Workshop on Dissemination of Findings of Vitamin A and Anaemia Prevalence Surveys - 1998 as it appears in World Health Organization (WHO). WHO Global Database on Vitamin A Deficiency. Geneva, Switzerland: World Health Organization (WHO)                                                                                                                                                                                                                                                        |
| 306 | Ghana VAST Study Team. Vitamin A supplementation in northern Ghana: effects on clinic attendances, hospital admissions, and child mortality. Ghana VAST Study Team. Lancet. 1993; 342(8862): 7-12 as it appears in Imdad A, Herzer K, Mayo-Wilson E, Yakoob MY, Bhutta ZA. Vitamin A supplementation for preventing morbidity and mortality in children from 6 months to 5 years of age. Cochrane Database Syst Rev. 2010; CD008524                                                                                            |
| 307 | Angola Vitamin A and Anaemia Survey 1998-1999 as it appears in World Health Organization (WHO). WHO Global Database on Vitamin A Deficiency. Geneva, Switzerland: World Health Organization (WHO)                                                                                                                                                                                                                                                                                                                              |
| 308 | Zimbabwe National Micronutrient Survey 1999 as it appears in World Health Organization (WHO). WHO Global Database on Vitamin A Deficiency. Geneva, Switzerland: World Health Organization (WHO)                                                                                                                                                                                                                                                                                                                                |
| 309 | Central African Republic National Survey on Vitamin A Deficiency, Iron Deficiency and the Consumption of Iodized Salt 1998-1999 as it appears in World Health Organization (WHO). WHO Global Database on Vitamin A Deficiency. Geneva, Switzerland: World Health Organization (WHO)                                                                                                                                                                                                                                            |
| 310 | Ethiopia MICAH Program Final Evaluation Report 2006 as it appears in World Health Organization (WHO). WHO Global Database on Vitamin A Deficiency. Geneva, Switzerland: World Health Organization (WHO)                                                                                                                                                                                                                                                                                                                        |
| 311 | Tanzania National Vitamin A Survey 1997 as it appears in World Health Organization (WHO). WHO Global Database on Vitamin A Deficiency. Geneva, Switzerland: World Health Organization (WHO)                                                                                                                                                                                                                                                                                                                                    |
| 312 | Haidar J, Demissie T. Malnutrition and xerophthalmia in rural communities of Ethiopia. East Afr Med J. 1999; 76(10): 590-3 as it appears in World Health Organization (WHO). WHO Global Database on Vitamin A Deficiency. Geneva, Switzerland: World Health Organization (WHO)                                                                                                                                                                                                                                                 |
| 313 | Danneskiold-Samsøe N, Fisker AB, Jørgensen MJ, Ravn H, Andersen A, Balde ID, Leo-Hansen C, Rodrigues A, Aaby P, Benn CS. Determinants of vitamin a deficiency in children between 6 months and 2 years of age in Guinea-Bissau. BMC Public Health. 2013; 172                                                                                                                                                                                                                                                                   |
| 314 | Benn CS, Aaby P, Balé C, Olsen J, Michaelsen KF, George E, Whittle H. Randomised trial of effect of vitamin A supplementation on antibody response to measles vaccine in Guinea-Bissau, west Africa. Lancet. 1997; 350(9071): 101-5 as it appears in Imdad A, Herzer K, Mayo-Wilson E, Yakoob MY, Bhutta ZA. Vitamin A supplementation for preventing morbidity and mortality in children from 6 months to 5 years of age. Cochrane Database Syst Rev. 2010; CD008524                                                          |
| 315 | Shankar AH, Genton B, Semba RD, Baisor M, Paino J, Tamja S, Adiguma T, Wu L, Rare L, Tielsch JM, Alpers MP, West KP. Effect of vitamin A supplementation on morbidity due to Plasmodium falciparum in young children in Papua New Guinea: a randomised trial. Lancet. 1999; 354(9174): 203-9 as it appears in Imdad A, Herzer K, Mayo-Wilson E, Yakoob MY, Bhutta ZA. Vitamin A supplementation for preventing morbidity and mortality in children from 6 months to 5 years of age. Cochrane Database Syst Rev. 2010; CD008524 |
| 316 | Diness BR, Christoffersen D, Pedersen UB, Rodrigues A, Fischer TK, Andersen A, Whittle H, Yazdanbakhsh M, Aaby P, Benn CS. The effect of high-dose vitamin A supplementation given with bacille Calmette-Guérin vaccine at birth on infant rotavirus infection and diarrhea: a randomized prospective study from Guinea-Bissau. J Infect Dis. 2010; S243-251                                                                                                                                                                   |
| 317 | Food and Agriculture Organization of the United Nations (FAO). FAOSTAT Food Balance Sheets, October 2014. Rome, Italy: Food and Agriculture Organization of the United Nations (FAO)                                                                                                                                                                                                                                                                                                                                           |
| 318 | Socio-Economic Determinants of Nutritional Status Among Children Under Five in Mauritania as it appears in World Health Organization (WHO). WHO Global Database on Child Growth and Malnutrition. Geneva, Switzerland: World Health Organization (WHO)                                                                                                                                                                                                                                                                         |



**Supplementary Table 3:** Data sources used for estimation of mortality associated with dietary risk factors of noncommunicable diseases in sub-Saharan Africa in the Global Burden of Diseases (GBD) study (source: <http://ghdx.healthdata.org/gbd-2015-data-citations>)

| No | Data sources                                                                                                                                                                                                                                                                                            |
|----|---------------------------------------------------------------------------------------------------------------------------------------------------------------------------------------------------------------------------------------------------------------------------------------------------------|
| 1  | Food and Agriculture Organization of the United Nations (FAO). FAOSTAT Food Balance Sheets, May 2013. Rome, Italy: Food and Agriculture Organization of the United Nations (FAO)                                                                                                                        |
| 2  | Congo - Brazzaville STEPS Noncommunicable Disease Risk Factors Survey 2004 as it appears in Global Dietary Database Consortium, Nutrition and Chronic Disease Expert Group (NutriCoDE). Global Dietary Database 1980-2011. [Unpublished]                                                                |
| 3  | Benin - Littoral STEPS Noncommunicable Disease Risk Factors Survey 2007 as it appears in Global Dietary Database Consortium, Nutrition and Chronic Disease Expert Group (NutriCoDE). Global Dietary Database 1980-2011. [Unpublished]                                                                   |
| 4  | Benin STEPS Noncommunicable Disease Risk Factors Survey 2008 as it appears in Global Dietary Database Consortium, Nutrition and Chronic Disease Expert Group (NutriCoDE). Global Dietary Database 1980-2011. [Unpublished]                                                                              |
| 5  | Zambia - Lusaka STEPS Noncommunicable Disease Risk Factors Survey 2008 as it appears in Global Dietary Database Consortium, Nutrition and Chronic Disease Expert Group (NutriCoDE). Global Dietary Database 1980-2011. [Unpublished]                                                                    |
| 6  | Madagascar - Antananarivo and Toliara STEPS Noncommunicable Disease Risk Factors Survey 2005 as it appears in Global Dietary Database Consortium, Nutrition and Chronic Disease Expert Group (NutriCoDE). Global Dietary Database 1980-2011. [Unpublished]                                              |
| 7  | Democratic Republic of the Congo - Kinshasa STEPS Noncommunicable Disease Risk Factors Survey 2005 as it appears in Global Dietary Database Consortium, Nutrition and Chronic Disease Expert Group (NutriCoDE). Global Dietary Database 1980-2011. [Unpublished]                                        |
| 8  | Mali STEPS Noncommunicable Disease Risk Factors Survey 2007 as it appears in Global Dietary Database Consortium, Nutrition and Chronic Disease Expert Group (NutriCoDE). Global Dietary Database 1980-2011. [Unpublished]                                                                               |
| 9  | Burkina Faso - Dietary Diversity as a Measure of the Micronutrient Adequacy of Women's Diets: Results from Ouagadougou, Burkina Faso Site as it appears in Global Dietary Database Consortium, Nutrition and Chronic Disease Expert Group (NutriCoDE). Global Dietary Database 1980-2011. [Unpublished] |
| 10 | Mali - Dietary Diversity as a Measure of the Micronutrient Adequacy of Women's Diets: Results from Bamako, Mali Site as it appears in Global Dietary Database Consortium, Nutrition and Chronic Disease Expert Group (NutriCoDE). Global Dietary Database 1980-2011. [Unpublished]                      |
| 11 | Cameroon STEPS Noncommunicable Disease Risk Factors Survey 2003 as it appears in Global Dietary Database Consortium, Nutrition and Chronic Disease Expert Group (NutriCoDE). Global Dietary Database 1980-2011. [Unpublished]                                                                           |
| 12 | Malawi STEPS Noncommunicable Disease Risk Factors Survey 2009 as it appears in Global Dietary Database Consortium, Nutrition and Chronic Disease Expert Group (NutriCoDE). Global Dietary Database 1980-2011. [Unpublished]                                                                             |
| 13 | Mauritania - Nouakchott STEPS Noncommunicable Disease Risk Factors Survey 2006 as it appears in Global Dietary Database Consortium, Nutrition and Chronic Disease Expert Group (NutriCoDE). Global Dietary Database 1980-2011. [Unpublished]                                                            |
| 14 | Botswana STEPS Noncommunicable Disease Risk Factors Survey 2007 as it appears in Global Dietary Database Consortium, Nutrition and Chronic Disease Expert Group (NutriCoDE). Global Dietary Database 1980-2011. [Unpublished]                                                                           |
| 15 | Niger STEPS Noncommunicable Disease Risk Factors Survey 2007 as it appears in Global Dietary Database Consortium, Nutrition and Chronic Disease Expert Group (NutriCoDE). Global Dietary Database 1980-2011. [Unpublished]                                                                              |
| 16 | Gabon - Estuaire STEPS Noncommunicable Disease Risk Factors Survey 2009 as it appears in Global Dietary Database Consortium, Nutrition and Chronic Disease Expert Group (NutriCoDE). Global Dietary Database 1980-2011. [Unpublished]                                                                   |
| 17 | Cape Verde STEPS Noncommunicable Disease Risk Factors Survey 2007 as it appears in Global Dietary Database Consortium, Nutrition and Chronic Disease Expert Group (NutriCoDE). Global Dietary Database 1980-2011. [Unpublished]                                                                         |
| 18 | Chad - Ville de N'Djaména STEPS Noncommunicable Disease Risk Factors Survey 2008 as it appears in Global Dietary Database Consortium, Nutrition and Chronic Disease Expert Group (NutriCoDE). Global Dietary Database 1980-2011. [Unpublished]                                                          |
| 19 | Mozambique STEPS Noncommunicable Disease Risk Factors Survey 2005 as it appears in Global Dietary Database Consortium, Nutrition and Chronic Disease Expert Group (NutriCoDE). Global Dietary Database 1980-2011. [Unpublished]                                                                         |
| 20 | Mozambique - Dietary Diversity as a Measure of the Micronutrient Adequacy of Women's Diets: Results from Rural Mozambique Site as it appears in Global Dietary Database Consortium, Nutrition and Chronic Disease Expert Group (NutriCoDE). Global Dietary Database 1980-2011. [Unpublished]            |
| 21 | Food and Nutrient Availability in South African Households 1995 as it appears in Global Dietary Database Consortium, Nutrition and Chronic Disease Expert Group (NutriCoDE). Global Dietary Database 1980-2011. [Unpublished]                                                                           |

|    |                                                                                                                                                                                                                                                                                                                                                                                                                                                                                                                                  |
|----|----------------------------------------------------------------------------------------------------------------------------------------------------------------------------------------------------------------------------------------------------------------------------------------------------------------------------------------------------------------------------------------------------------------------------------------------------------------------------------------------------------------------------------|
| 22 | Sierra Leone STEPS Noncommunicable Disease Risk Factors Survey 2009 as it appears in Global Dietary Database Consortium, Nutrition and Chronic Disease Expert Group (NutriCoDE). Global Dietary Database 1980-2011. [Unpublished]                                                                                                                                                                                                                                                                                                |
| 23 | Swaziland STEPS Noncommunicable Disease Risk Factors Survey 2007 as it appears in Global Dietary Database Consortium, Nutrition and Chronic Disease Expert Group (NutriCoDE). Global Dietary Database 1980-2011. [Unpublished]                                                                                                                                                                                                                                                                                                   |
| 24 | Eritrea STEPS Noncommunicable Disease Risk Factors Survey 2004 as it appears in Global Dietary Database Consortium, Nutrition and Chronic Disease Expert Group (NutriCoDE). Global Dietary Database 1980-2011. [Unpublished]                                                                                                                                                                                                                                                                                                     |
| 25 | Ethiopia - Addis Ababa STEPS Noncommunicable Disease Risk Factors Survey 2006 as it appears in Global Dietary Database Consortium, Nutrition and Chronic Disease Expert Group (NutriCoDE). Global Dietary Database 1980-2011. [Unpublished]                                                                                                                                                                                                                                                                                      |
| 26 | Oguntona CR, Tella TO. Street foods and dietary intakes of Nigerian urban market women. <i>Int J Food Sci Nutr.</i> 1999; 50(6): 383-90 as it appears in Global Dietary Database Consortium, Nutrition and Chronic Disease Expert Group (NutriCoDE). Global Dietary Database 1980-2011. [Unpublished]                                                                                                                                                                                                                            |
| 27 | Euromonitor International. Partially Hydrogenated Vegetable Oil Sales Database                                                                                                                                                                                                                                                                                                                                                                                                                                                   |
| 28 | The INTERSALT Co-operative Research Group. Appendix tables. Centre-specific results by age and sex. <i>J Hum Hypertens</i> 1989;3(5):331-407 as it appears in Global Dietary Database Consortium, Nutrition and Chronic Disease Expert Group (NutriCoDE). Global Dietary Database 1980-2011. [Unpublished]                                                                                                                                                                                                                       |
| 29 | Melse-Boonstra A, Rozendaal M, Rexwinkel H, Gerichhausen MJ, van den Briel T, Bulux J, Solomons NW, West CE. Determination of discretionary salt intake in rural Guatemala and Benin to determine the iodine fortification of salt required to control iodine deficiency disorders: studies using lithium-labeled salt. <i>Am J Clin Nutr.</i> 1998; 68(3): 636-41 as it appears in Global Dietary Database Consortium, Nutrition and Chronic Disease Expert Group (NutriCoDE). Global Dietary Database 1980-2011. [Unpublished] |
| 30 | Pavan L, Casiglia E, Pauletto P, Batista SL, Ginocchio G, Kwankam MM, Biasin R, Mazza A, Puato M, Russo E, Pessina AC. Blood pressure, serum cholesterol and nutritional state in Tanzania and in the Amazon: comparison with an Italian population. <i>J Hypertens.</i> 1997; 15(10): 1083-90 as it appears in Global Dietary Database Consortium, Nutrition and Chronic Disease Expert Group (NutriCoDE). Global Dietary Database 1980-2011. [Unpublished]                                                                     |
| 31 | Cooper R, Rotimi C, Ataman S, McGee D, Osotimehin B, Kadiri S, Muna W, Kingue S, Fraser H, Forrester T, Bennett F, Wilks R. The prevalence of hypertension in seven populations of West African origin. <i>Am J Public Health.</i> 1997; 87(2): 160-8 as it appears in Global Dietary Database Consortium, Nutrition and Chronic Disease Expert Group (NutriCoDE). Global Dietary Database 1980-2011. [Unpublished]                                                                                                              |
| 32 | Simmons D, Barbour G, Congleton J, Levy J, Meacher P, Saul H, Sowerby T. Blood pressure and salt intake in Malawi: an urban rural study. <i>J Epidemiol Community Health.</i> 1986; 40(2): 188-92 as it appears in Global Dietary Database Consortium, Nutrition and Chronic Disease Expert Group (NutriCoDE). Global Dietary Database 1980-2011. [Unpublished]                                                                                                                                                                  |
| 33 | Hess SY, Zimmermann MB, Staubli-Asobayire F, Tebi A, Hurrell RF. An evaluation of salt intake and iodine nutrition in a rural and urban area of the Côte d'Ivoire. <i>Eur J Clin Nutr.</i> 1999; 53(9): 680-6 as it appears in Global Dietary Database Consortium, Nutrition and Chronic Disease Expert Group (NutriCoDE). Global Dietary Database 1980-2011. [Unpublished]                                                                                                                                                      |
| 34 | Barlow RJ, Connell MA, Levendig BJ, Gear JS, Milne FJ. A comparative study of urinary sodium and potassium excretion in normotensive urban black and white South African males. <i>S Afr Med J.</i> 1982; 62(25): 939-41 as it appears in Global Dietary Database Consortium, Nutrition and Chronic Disease Expert Group (NutriCoDE). Global Dietary Database 1980-2011. [Unpublished]                                                                                                                                           |
| 35 | Charlton KE, Steyn K, Levitt NS, Peer N, Jonathan D, Gogela T, Rossouw K, Gwebushe N, Lombard CJ. A food-based dietary strategy lowers blood pressure in a low socio-economic setting: a randomised study in South Africa. <i>Public Health Nutr.</i> 2008; 11(12): 1397-406 as it appears in Global Dietary Database Consortium, Nutrition and Chronic Disease Expert Group (NutriCoDE). Global Dietary Database 1980-2011. [Unpublished]                                                                                       |
| 36 | Maseko MJ, Majane HO, Milne J, Norton GR, Woodiwiss AJ. Salt intake in an urban, developing South African community. <i>Cardiovasc J S Afr.</i> 2006; 17(4): 186-91 as it appears in Global Dietary Database Consortium, Nutrition and Chronic Disease Expert Group (NutriCoDE). Global Dietary Database 1980-2011. [Unpublished]                                                                                                                                                                                                |
| 37 | Kerry SM, Emmett L, Micah FB, Martin-Peprah R, Antwi S, Phillips RO, Plange-Rhule J, Eastwood JB, Cappuccio FP. Rural and semi-urban differences in salt intake, and its dietary sources, in Ashanti, West Africa. <i>Ethn Dis.</i> 2005; 15(1): 33-9 as it appears in Global Dietary Database Consortium, Nutrition and Chronic Disease Expert Group (NutriCoDE). Global Dietary Database 1980-2011. [Unpublished]                                                                                                              |



**Supplementary Table 4:** Data sources used for estimation of mortality associated with overweight/obesity in sub-Saharan Africa in the Global Burden of Diseases (GBD) study (source: <http://ghdx.healthdata.org/gbd-2015-data-citations>)

| No | Data sources                                                                                                                                                                                                                                                                                                                                                                                                                    |
|----|---------------------------------------------------------------------------------------------------------------------------------------------------------------------------------------------------------------------------------------------------------------------------------------------------------------------------------------------------------------------------------------------------------------------------------|
| 1  | Macro International, Inc, National Institute of Statistics and Economic Analysis (INSAE) (Benin), Benin Demographic and Health Survey 1996. Calverton, United States: Macro International, Inc                                                                                                                                                                                                                                  |
| 2  | National Institute of Statistics and Economic Analysis (INSAE) (Benin), ORC Macro. Benin Demographic and Health Survey 2001. Calverton, United States: ORC Macro                                                                                                                                                                                                                                                                |
| 3  | National Institute of Statistics and Economic Analysis (INSAE) (Benin), National Program Against AIDS (PNLS) (Benin), Macro International, Inc. Benin Demographic and Health Survey 2006. Calverton, United States: Macro International, Inc                                                                                                                                                                                    |
| 4  | Macro International, Inc, National Center for Statistics and Economic Studies (Congo, Rep.). Congo Demographic and Health Survey 2005. Calverton, United States: Macro International, Inc                                                                                                                                                                                                                                       |
| 5  | Central Bureau of Statistics (Kenya), Macro International, Inc, National Council for Population Development (NCPD). Kenya Demographic and Health Survey 1993. Calverton, United States: Macro International, Inc                                                                                                                                                                                                                |
| 6  | Central Bureau of Statistics (Kenya), Macro International, Inc, National Council for Population Development (NCPD). Kenya Demographic and Health Survey 1998. Calverton, United States: Macro International, Inc                                                                                                                                                                                                                |
| 7  | Centers for Disease Control and Prevention (CDC), Central Bureau of Statistics (Kenya), Macro International, Inc, Ministry of Health (Kenya), National Council for Population and Development (Kenya). Kenya Demographic and Health Survey 2003. Calverton, United States: Macro International, Inc                                                                                                                             |
| 8  | Liberia Institute for Statistics and Geo-information Services (LISGIS), Macro International, Inc. Liberia Demographic and Health Survey 2006-2007. Calverton, United States: Macro International, Inc                                                                                                                                                                                                                           |
| 9  | Macro International, Inc, Statistics Department (Uganda). Uganda Demographic and Health Survey 1995. Calverton, United States: Macro International, Inc                                                                                                                                                                                                                                                                         |
| 10 | Macro International, Inc, Uganda Bureau of Statistics. Uganda Demographic and Health Survey 2000-2001. Calverton, United States: Macro International, Inc                                                                                                                                                                                                                                                                       |
| 11 | Macro International, Inc, Uganda Bureau of Statistics. Uganda Demographic and Health Survey 2006. Calverton, United States: Macro International, Inc                                                                                                                                                                                                                                                                            |
| 12 | ICF Macro, Kenya Medical Research Institute (KEMRI), Kenya National Bureau of Statistics, Ministry of Public Health and Sanitation (Kenya), National AIDS and STI Control Program (Kenya), National Aids Control Council (NACC), National Coordinating Agency for Population and Development (Kenya). Kenya Demographic and Health Survey 2008-2009. Calverton, United States: ICF Macro                                        |
| 13 | World Health Organization (WHO). Congo World Health Survey 2003. Geneva, Switzerland: World Health Organization (WHO), 2005                                                                                                                                                                                                                                                                                                     |
| 14 | Ministry of Health (Congo, Rep.), World Health Organization (WHO). Congo - Brazzaville STEPS Noncommunicable Disease Risk Factors Survey 2004                                                                                                                                                                                                                                                                                   |
| 15 | Ministry of Health (Benin), World Health Organization (WHO). Benin - Littoral STEPS Noncommunicable Disease Risk Factors Survey 2007                                                                                                                                                                                                                                                                                            |
| 16 | ICF Macro, Uganda Bureau of Statistics. Uganda Demographic and Health Survey 2011. Calverton, United States: ICF Macro                                                                                                                                                                                                                                                                                                          |
| 17 | ICF International, Ministry of Health (Congo, Rep.), National Center for Statistics and Economic Studies (Congo, Rep.). Congo Demographic and Health Survey 2011-2012. Fairfax, United States: ICF International, 2013                                                                                                                                                                                                          |
| 18 | ICF International, National Institute of Statistics and Economic Analysis (INSAE) (Benin), National Program Against AIDS (PNLS) (Benin). Benin Demographic and Health Survey 2011-2012. Fairfax, United States: ICF International, 2014                                                                                                                                                                                         |
| 19 | World Health Organization (WHO). Liberia STEPS Noncommunicable Disease Risk Factors Survey 2011                                                                                                                                                                                                                                                                                                                                 |
| 20 | ICF International, Kenya Medical Research Institute (KEMRI), Kenya National Bureau of Statistics, Ministry of Health (Kenya), National AIDS Control Council (Kenya), National Council for Population and Development (Kenya). Kenya Demographic and Health Survey 2014. Fairfax, United States: ICF International, 2015                                                                                                         |
| 21 | Ministry of Health (Uganda), World Health Organization (WHO). Uganda STEPS Noncommunicable Disease Risk Factors Survey 2014                                                                                                                                                                                                                                                                                                     |
| 22 | Kavishe B, Biraro S, Baisley K, Vanobberghen F, Kapiga S, Munderi P, Smeeth L, Peck R, Mghamba J, Mutungi G, Ikoona E, Levin J, Bou Monclús MA, Katende D, Kisanga E, Hayes R, Grosskurth H. High prevalence of hypertension and of risk factors for non-communicable diseases (NCDs): a population based cross-sectional survey of NCDs and HIV infection in Northwestern Tanzania and Southern Uganda. BMC Med. 2015; 13: 126 |
| 23 | Macro International, Inc, National Institute of Statistics and Demography (Burkina Faso). Burkina Faso Demographic and Health Survey 1992-1993. Calverton, United States: Macro International, Inc                                                                                                                                                                                                                              |
| 24 | Macro International, Inc, National Institute of Statistics and Demography (Burkina Faso). Burkina Faso Demographic and Health Survey 1998-1999. Calverton, United States: Macro International, Inc                                                                                                                                                                                                                              |
| 25 | Macro International, Inc, National Institute of Statistics and Demography (Burkina Faso). Burkina Faso Demographic and Health Survey 2003. Calverton, United States: Macro International, Inc                                                                                                                                                                                                                                   |
| 26 | ICF Macro, Ministry of Health (Burkina Faso), National Institute of Statistics and Demography (Burkina Faso). Burkina Faso Demographic and Health Survey 2010-2011. Calverton, United States: ICF Macro                                                                                                                                                                                                                         |
| 27 | Macro International, Inc, Ministry of Planning (Congo, DR). Democratic Republic of the Congo Demographic and Health Survey 2007. Calverton, United States: Macro International, Inc                                                                                                                                                                                                                                             |
| 28 | Macro International, Inc, National Institute of Statistics (Madagascar). Madagascar Demographic and Health Survey 1997. Calverton, United States: Macro International, Inc                                                                                                                                                                                                                                                      |
| 29 | Macro International, Inc, National Institute of Statistics (Madagascar). Madagascar Demographic and Health Survey 2003-2004. Calverton, United States: Macro International, Inc                                                                                                                                                                                                                                                 |

|    |                                                                                                                                                                                                                                                                                             |
|----|---------------------------------------------------------------------------------------------------------------------------------------------------------------------------------------------------------------------------------------------------------------------------------------------|
| 30 | Macro International, Inc, Ministry of Health (Mali), National Directorate of Statistics and Informatics (DNSI) (Mali). Mali Demographic and Health Survey 2006. Calverton, United States: Macro International, Inc                                                                          |
| 31 | Macro International, Inc, National Directorate of Statistics and Informatics (DNSI) (Mali), Planning and Statistics Unit, Ministry of Health (Mali). Mali Demographic and Health Survey 1995-1996. Calverton, United States: Macro International, Inc                                       |
| 32 | Macro International, Inc, National Directorate of Statistics and Informatics (DNSI) (Mali), Planning and Statistics Unit, Ministry of Health (Mali). Mali Demographic and Health Survey 2001. Calverton, United States: Macro International, Inc                                            |
| 33 | Central Statistical Office (Zambia), Macro International, Inc, University of Zambia. Zambia Demographic and Health Survey 1992. Calverton, United States: Macro International, Inc                                                                                                          |
| 34 | Central Statistical Office (Zambia), Macro International, Inc, Ministry of Health (Zambia). Zambia Demographic and Health Survey 1996-1997. Calverton, United States: Macro International, Inc                                                                                              |
| 35 | Central Board of Health (Zambia), Central Statistical Office (Zambia), Macro International, Inc. Zambia Demographic and Health Survey 2001-2002. Calverton, United States: Macro International, Inc                                                                                         |
| 36 | Central Statistical Office (Zambia), Macro International, Inc. Zambia Demographic and Health Survey 2007. Calverton, United States: Macro International, Inc                                                                                                                                |
| 37 | ICF Macro, National Institute of Statistics (Madagascar). Madagascar Demographic and Health Survey 2008-2009. Calverton, United States: ICF Macro, 2010                                                                                                                                     |
| 38 | Ministry of Health (Zambia), World Health Organization (WHO). Zambia - Lusaka STEPS Noncommunicable Disease Risk Factors Survey 2008                                                                                                                                                        |
| 39 | Ministry of Public Health (Congo, DR), World Health Organization (WHO). Democratic Republic of the Congo - Kinshasa STEPS Noncommunicable Disease Risk Factors Survey 2005                                                                                                                  |
| 40 | Central Statistical Office (Zambia), ICF International, Ministry of Health (Zambia), Tropical Diseases Research Centre, University Teaching Hospital (Zambia), University of Zambia. Zambia Demographic and Health Survey 2013-2014. Fairfax, United States: ICF International, 2015        |
| 41 | World Health Organization (WHO). Mali STEPS Noncommunicable Disease Risk Factors Survey 2007                                                                                                                                                                                                |
| 42 | Health Promotion Research Institute (Hungary), Hungarian Gallup Institute. Hungary National Population Health Survey 2000                                                                                                                                                                   |
| 43 | Mauny F, Viel JF, Roubaux F, Ratsimandresy R, Sellin B. Blood pressure, body mass index and socio-economic status in the urban population of Antananarivo (Madagascar). Ann Trop Med Parasitol. 2003; 97(6): 645-54                                                                         |
| 44 | Torheim LE, Granli GI, Sidibé CS, Traoré AK, Oshaug A. Women's iodine status and its determinants in an iodine-deficient area in the Kayes region, Mali. Public Health Nutr. 2005; 8(4): 387-94                                                                                             |
| 45 | Doulougou B, Kouanda S, Rossier C, Soura A, Zunzunegui MV. Differences in hypertension between informal and formal areas of Ouagadougou, a sub-Saharan African city. BMC Public Health. 2014; 14: 893                                                                                       |
| 46 | Central Bureau of the Census and Population Studies (Cameroon), Macro International, Inc. Cameroon Demographic and Health Survey 1998. Calverton, United States: Macro International, Inc                                                                                                   |
| 47 | Macro International, Inc, National Institute of Statistics (Cameroon). Cameroon Demographic and Health Survey 2004. Calverton, United States: Macro International, Inc                                                                                                                      |
| 48 | ICF International, Ministry of Economy, Planning and Regional Development (Cameroon), Ministry of Public Health (Cameroon), National Institute of Statistics (Cameroon), Pasteur Center of Cameroon. Cameroon Demographic and Health Survey 2011. Fairfax, United States: ICF International |
| 49 | Macro International, Inc, National Statistical Office of Malawi. Malawi Demographic and Health Survey 1992. Calverton, United States: Macro International, Inc                                                                                                                              |
| 50 | Macro International, Inc, National Statistical Office of Malawi. Malawi Demographic and Health Survey 2000. Calverton, United States: Macro International, Inc                                                                                                                              |
| 51 | Macro International, Inc, National Statistical Office of Malawi. Malawi Demographic and Health Survey 2004-2005. Calverton, United States: Macro International, Inc                                                                                                                         |
| 52 | Macro International, Inc, National Office of Statistics (Mauritania). Mauritania Demographic and Health Survey 2000-2001. Calverton, United States: Macro International, Inc                                                                                                                |
| 53 | ICF Macro, National Statistical Office of Malawi. Malawi Demographic and Health Survey 2010. Calverton, United States: ICF Macro                                                                                                                                                            |
| 54 | World Health Organization (WHO). Malawi World Health Survey 2003. Geneva, Switzerland: World Health Organization (WHO), 2005                                                                                                                                                                |
| 55 | Health of Populations in Transition (HoPiT) Research Group (Cameroon), Ministry of Public Health (Cameroon), World Diabetes Foundation (WDF), World Health Organization (WHO). Cameroon STEPS Noncommunicable Disease Risk Factors Survey 2003                                              |
| 56 | Ministry of Health (Malawi), World Health Organization (WHO). Malawi STEPS Noncommunicable Disease Risk Factors Survey 2009                                                                                                                                                                 |
| 57 | Ministry of Health (Mauritania), World Health Organization (WHO). Mauritania - Nouakchott STEPS Noncommunicable Disease Risk Factors Survey 2006                                                                                                                                            |
| 58 | Kamadjeu RM, Edwards R, Atanga JS, Kiawi EC, Unwin N, Mbanya J-C. Anthropometry measures and prevalence of obesity in the urban adult population of Cameroon: an update from the Cameroon Burden of Diabetes Baseline Survey. BMC Public Health. 2006; 228                                  |
| 59 | Chilima DM, Ismail SJ. Anthropometric characteristics of older people in rural Malawi. Eur J Clin Nutr. 1998; 52(9): 643-9                                                                                                                                                                  |
| 60 | Pasquet P, Temgoua LS, Melaman-Sego F, Froment A, Rikong-Adié H. Prevalence of overweight and obesity for urban adults in Cameroon. Ann Hum Biol. 2003; 30(5): 551-62                                                                                                                       |
| 61 | Fezeu L, Minkoulou E, Balkau B, Kengne A-P, Awah P, Unwin N, Alberti GKMM, Mbanya J-C. Association between socioeconomic status and adiposity in urban Cameroon. Int J Epidemiol. 2006; 35(1): 105-11                                                                                       |
| 62 | General Directorate of Statistics and Economic Studies (Gabon), Macro International, Inc. Gabon Demographic and Health Survey 2000-2001. Calverton, United States: Macro International, Inc                                                                                                 |
| 63 | Department of Statistics and National Accounts (Niger), Macro International, Inc. Niger Demographic and Health Survey 2006. Calverton, United States: Macro International, Inc                                                                                                              |
| 64 | Department of Statistics and National Accounts (Niger), Macro International, Inc. Niger Demographic and Health Survey 1992. Calverton, United States: Macro International, Inc                                                                                                              |
| 65 | CARE International, Macro International, Inc. Niger Demographic and Health Survey 1998. Calverton, United States: Macro International, Inc                                                                                                                                                  |
| 66 | Ministry of Health (Botswana), Ministry of Local Government (Botswana), World Health Organization (WHO). Botswana STEPS Noncommunicable Disease Risk Factors Survey 2007                                                                                                                    |

|     |                                                                                                                                                                                                                                                                            |
|-----|----------------------------------------------------------------------------------------------------------------------------------------------------------------------------------------------------------------------------------------------------------------------------|
| 67  | Ministry of Health (Niger), World Health Organization (WHO). Niger STEPS Noncommunicable Disease Risk Factors Survey 2007                                                                                                                                                  |
| 68  | Ministry of Health and Public Hygiene (Gabon), World Health Organization (WHO). Gabon - Estuaire STEPS Noncommunicable Disease Risk Factors Survey 2009                                                                                                                    |
| 69  | ICF International, Ministry of Public Health (Niger), National Institute of Statistics (Niger). Niger Demographic and Health Survey 2012. Fairfax, United States: ICF International, 2014                                                                                  |
| 70  | General Directorate of Statistics (Gabon), ICF International, Ministry of Economy, Employment and Sustainable Development (Gabon), Ministry of Health (Gabon). Gabon Demographic and Health Survey 2012. Fairfax, United States: ICF International, 2013                   |
| 71  | World Health Organization (WHO). Cape Verde STEPS Noncommunicable Disease Risk Factors Survey 2007                                                                                                                                                                         |
| 72  | Census Bureau (Chad), Macro International, Inc, National Institute of Statistical, Economic and Demographic Studies (Chad). Chad Demographic and Health Survey 1996-1997. Calverton, United States: Macro International, Inc                                               |
| 73  | Macro International, Inc, National Institute of Statistical, Economic and Demographic Studies (Chad). Chad Demographic and Health Survey 2004. Calverton, United States: Macro International, Inc                                                                          |
| 74  | Bureau of Statistics (Lesotho), Macro International, Inc, Ministry of Health and Social Welfare (Lesotho). Lesotho Demographic and Health Survey 2004-2005. Calverton, United States: Macro International, Inc                                                             |
| 75  | Macro International, Inc, National Institute of Statistics (INE) (Mozambique). Mozambique Demographic and Health Survey 1997. Calverton, United States: Macro International, Inc                                                                                           |
| 76  | Macro International, Inc, National Institute of Statistics (INE) (Mozambique). Mozambique Demographic and Health Survey 2003-2004. Calverton, United States: Macro International, Inc                                                                                      |
| 77  | National Population Commission of Nigeria, ORC Macro, UK Department for International Development (DFID), United Nations Children's Fund (UNICEF), United Nations Population Fund (UNFPA). Nigeria Demographic and Health Survey 2003. Calverton, United States: ORC Macro |
| 78  | ICF Macro, Ministry of Health and Social Welfare (Lesotho). Lesotho Demographic and Health Survey 2009-2010. Calverton, United States: ICF Macro                                                                                                                           |
| 79  | Macro International, Inc, National Population Commission of Nigeria. Nigeria Demographic and Health Survey 2008. Calverton, United States: Macro International, Inc, 2009                                                                                                  |
| 80  | Ministry of Public Health (Chad), World Health Organization (WHO). Chad - Ville de N'Djaména STEPS Noncommunicable Disease Risk Factors Survey 2008                                                                                                                        |
| 81  | Federal Ministry of Health (Nigeria), Nigerian Heart Foundation, World Health Organization (WHO). Nigeria - Lagos STEPS Noncommunicable Disease Risk Factors Survey 2003                                                                                                   |
| 82  | Ministry of Health (Mozambique), World Health Organization (WHO). Mozambique STEPS Noncommunicable Disease Risk Factors Survey 2005                                                                                                                                        |
| 83  | ICF Macro, Manhica Health Research Center (CISM), Ministry of Health (Mozambique), National Institute of Statistics (INE) (Mozambique). Mozambique Demographic and Health Survey 2011. Calverton, United States: ICF Macro, 2013                                           |
| 84  | ICF International, National Population Commission of Nigeria. Nigeria Demographic and Health Survey 2013. Fairfax, United States: ICF International, 2014                                                                                                                  |
| 85  | Ministry of Health and Social Welfare (Lesotho), World Health Organization (WHO). Lesotho STEPS Noncommunicable Disease Risk Factors Survey 2012                                                                                                                           |
| 86  | Iliyasu Z, Abubakar IS, Abubakar S, Lawan UM, Gajida AU, Jibo AM. A survey of weight perception and social desirability of obesity among adults in Kano Metropolis, Northern Nigeria. Niger J Med. 2013; 22(2): 101-8                                                      |
| 87  | Macro International, Inc, National Institute of Statistics (Côte d'Ivoire). Côte d'Ivoire Demographic and Health Survey 1994. Calverton, United States: Macro International, Inc                                                                                           |
| 88  | Macro International, Inc, National Institute of Statistics (Côte d'Ivoire). Côte d'Ivoire Demographic and Health Survey 1998-1999. Calverton, United States: Macro International, Inc                                                                                      |
| 89  | ICF International, Ministry of the Fight Against AIDS (Côte d'Ivoire), National Institute of Statistics (Côte d'Ivoire). Côte d'Ivoire Demographic and Health Survey 2011-2012. Fairfax, United States: ICF International, 2013                                            |
| 90  | Central Statistics Office (Namibia), Macro International, Inc, Ministry of Health and Social Services (Namibia). Namibia Demographic and Health Survey 1992. Calverton, United States: Macro International, Inc                                                            |
| 91  | Macro International, Inc, Ministry of Health and Social Services (Namibia). Namibia Demographic and Health Survey 2006-2007. Calverton, United States: Macro International, Inc                                                                                            |
| 92  | Macro International, Inc, National Office of Population (Rwanda). Rwanda Demographic and Health Survey 2000. Calverton, United States: Macro International, Inc                                                                                                            |
| 93  | Macro International, Inc, National Institute of Statistics of Rwanda. Rwanda Demographic and Health Survey 2005. Calverton, United States: Macro International, Inc                                                                                                        |
| 94  | World Health Organization (WHO). Côte d'Ivoire World Health Survey 2003. Geneva, Switzerland: World Health Organization (WHO), 2005                                                                                                                                        |
| 95  | World Health Organization (WHO). Namibia World Health Survey 2003. Geneva, Switzerland: World Health Organization (WHO), 2005                                                                                                                                              |
| 96  | ICF Macro, Ministry of Health (Sao Tome and Principe), National Institute of Statistics (Sao Tome and Principe). Sao Tome and Principe Demographic and Health Survey 2008-2009. Calverton, United States: ICF Macro                                                        |
| 97  | Department of Statistics (Rwanda), United Nations Children's Fund (UNICEF). Rwanda Multiple Indicator Cluster Survey 2000. New York, United States: United Nations Children's Fund (UNICEF)                                                                                |
| 98  | Ministry of Health (Côte d'Ivoire), World Health Organization (WHO). Côte d'Ivoire - Lagunes STEPS Noncommunicable Disease Risk Factors Survey 2005                                                                                                                        |
| 99  | Burundi Institute of Statistics and Economic Studies, ICF International, Ministry of Public Health and the Fight against AIDS (Burundi). Burundi Demographic and Health Survey 2010-2011. Fairfax, United States: ICF International, 2012                                  |
| 100 | Department of Statistics (Côte d'Ivoire), World Bank (WB). Côte d'Ivoire Living Standards Measurement Survey 1986-1987. Washington, DC, United States: World Bank (WB)                                                                                                     |
| 101 | Department of Statistics (Côte d'Ivoire). Côte d'Ivoire Living Standards Measurement Survey 1987-1988. Washington, DC, United States: World Bank (WB)                                                                                                                      |
| 102 | Department of Statistics (Côte d'Ivoire). Côte d'Ivoire Living Standards Measurement Survey 1988-1989. Washington, DC, United States: World Bank (WB)                                                                                                                      |
| 103 | ICF Macro, Ministry of Health (Rwanda), National Institute of Statistics of Rwanda. Rwanda Demographic and Health Survey 2010-2011. Calverton, United States: ICF Macro                                                                                                    |

|     |                                                                                                                                                                                                                                                                                                                                                        |
|-----|--------------------------------------------------------------------------------------------------------------------------------------------------------------------------------------------------------------------------------------------------------------------------------------------------------------------------------------------------------|
| 104 | World Health Organization (WHO). Sao Tome and Principe STEPS Noncommunicable Disease Risk Factors Survey 2008                                                                                                                                                                                                                                          |
| 105 | Centers for Disease Control and Prevention (CDC), Ministry of Health (Rwanda), National Institute of Statistics of Rwanda, Rwanda Biomedical Center, World Health Organization (WHO). Rwanda STEPS Noncommunicable Disease Risk Factor Survey 2012-2013                                                                                                |
| 106 | ICF International, Ministry of Health and Social Services (Namibia), Namibia Institute of Pathology, Namibia Statistics Agency. Namibia Demographic and Health Survey 2013. Fairfax, United States: ICF International, 2015                                                                                                                            |
| 107 | Macro International, Inc, National Centre of Documentation and Scientific Research (Comoros). Comoros Demographic and Health Survey 1996. Calverton, United States: Macro International, Inc                                                                                                                                                           |
| 108 | Directorate of Forecasting and Statistics, Ministry of the Economy, Finance and Planning (Senegal), Macro International, Inc. Senegal Demographic and Health Survey 1992-1993. Calverton, United States: Macro International, Inc                                                                                                                      |
| 109 | Department of Health (South Africa), Macro International, Inc, South African Medical Research Council. South Africa Demographic and Health Survey 1998. Calverton, United States: Macro International, Inc                                                                                                                                             |
| 110 | Department of Health (South Africa), Macro International, Inc, South African Medical Research Council. South Africa Demographic and Health Survey 2003-2004                                                                                                                                                                                            |
| 111 | World Health Organization (WHO). Comoros World Health Survey 2003. Geneva, Switzerland: World Health Organization (WHO), 2005                                                                                                                                                                                                                          |
| 112 | World Health Organization (WHO). Senegal World Health Survey 2003. Geneva, Switzerland: World Health Organization (WHO), 2005                                                                                                                                                                                                                          |
| 113 | World Health Organization (WHO). South Africa World Health Survey 2002-2003. Geneva, Switzerland: World Health Organization (WHO), 2005                                                                                                                                                                                                                |
| 114 | Joint Health Surveys Unit of Social and Community Planning Research and University College London, Health Survey for England, 1997 [computer file]. 2nd ed. Colchester, Essex: UK Data Archive [distributor], 4 December 2000. SN: 3979                                                                                                                |
| 115 | National Centre for Social Research, University College London Department of Epidemiology and Public Health, Health Survey for England, 1998 [computer file]. 4th ed. Colchester, Essex: UK Data Archive [distributor], 30 November 2002. SN: 4150                                                                                                     |
| 116 | National Centre for Social Research and University College London. Department of Epidemiology and Public Health, Health Survey for England, 1999 [computer file]. 3rd Edition. Colchester, Essex: UK Data Archive [distributor], February 2002. SN: 4365                                                                                               |
| 117 | National Centre for Social Research, University College London Department of Epidemiology and Public Health, Health Survey for England, 2000 [computer file]. Colchester, Essex: UK Data Archive [distributor], 23 April 2002. SN: 4487                                                                                                                |
| 118 | National Centre for Social Research and University College London. Department of Epidemiology and Public Health, Health Survey for England, 2001 [computer file]. 2nd Edition. Colchester, Essex: UK Data Archive [distributor], June 2004. SN: 4628                                                                                                   |
| 119 | National Centre for Social Research and University College London. Department of Epidemiology and Public Health, Health Survey for England, 2003 [computer file]. Colchester, Essex: UK Data Archive [distributor], March 2005. SN: 5098                                                                                                               |
| 120 | National Centre for Social Research and University College London. Department of Epidemiology and Public Health, Health Survey for England, 2004 [computer file]. Colchester, Essex: UK Data Archive [distributor], July 2006. SN: 5439                                                                                                                |
| 121 | National Centre for Social Research and University College London. Department of Epidemiology and Public Health, Health Survey for England, 2005 [computer file]. Colchester, Essex: UK Data Archive [distributor], July 2007. SN: 5675                                                                                                                |
| 122 | National Centre for Social Research and University College London. Department of Epidemiology and Public Health, Health Survey for England, 2006 [computer file]. 4th Edition. Colchester, Essex: UK Data Archive [distributor], July 2011. SN: 5809, <a href="http://dx.doi.org/10.5255/UKDA-SN-5809-1">http://dx.doi.org/10.5255/UKDA-SN-5809-1</a>  |
| 123 | Ministry of Health and Prevention (Senegal), Research Center for Human Development (Senegal). Senegal Demographic and Health Survey 2005. Calverton, United States: Macro International, Inc                                                                                                                                                           |
| 124 | University of Cape Town, Southern Africa Labour and Development Research Unit. National Income Dynamics Study (NIDS) Wave 1 [computer files]. Cape Town: Southern Africa Labour and Development Research Unit [producer], 2009. Cape Town: DataFirst [distributor], 2009                                                                               |
| 125 | Center for Research in Human Development (CRDH), Cheikh Anta Diop University, Hospital Aristide Le Dantec, ICF Macro, National Agency of Statistics and Demography (Senegal). Senegal Demographic and Health Survey 2010-2011. Calverton, United States: ICF Macro                                                                                     |
| 126 | Gambia Bureau of Statistics (GBOS), ICF International, Ministry of Health and Social Welfare (Gambia). Gambia Demographic and Health Survey 2013. Fairfax, United States: ICF International, 2015                                                                                                                                                      |
| 127 | National Centre for Social Research and University College London. Department of Epidemiology and Public Health, Health Survey for England, 2007 [computer file]. 2nd Edition. Colchester, Essex: UK Data Archive [distributor], April 2010. SN: 6112, <a href="http://dx.doi.org/10.5255/UKDA-SN-6112-1">http://dx.doi.org/10.5255/UKDA-SN-6112-1</a> |
| 128 | National Centre for Social Research and University College London. Department of Epidemiology and Public Health, Health Survey for England, 2008 [computer file]. 3rd Edition. Colchester, Essex: UK Data Archive [distributor], July 2011. SN: 6397, <a href="http://dx.doi.org/10.5255/UKDA-SN-6397-1">http://dx.doi.org/10.5255/UKDA-SN-6397-1</a>  |
| 129 | National Centre for Social Research and University College London. Department of Epidemiology and Public Health, Health Survey for England, 2009 [computer file]. 2nd Edition. Colchester, Essex: UK Data Archive [distributor], July 2011. SN: 6732, <a href="http://dx.doi.org/10.5255/UKDA-SN-6732-1">http://dx.doi.org/10.5255/UKDA-SN-6732-1</a>  |
| 130 | Southern Africa Labour Development Research Unit (SALDRU), University of Cape Town. South Africa Integrated Family Survey 1999                                                                                                                                                                                                                         |
| 131 | World Health Organization (WHO). Comoros STEPS Noncommunicable Disease Risk Factors Survey 2011                                                                                                                                                                                                                                                        |
| 132 | World Health Organization (WHO). Gambia STEPS Noncommunicable Disease Risk Factors Survey 2010                                                                                                                                                                                                                                                         |

|     |                                                                                                                                                                                                                                                                                                                                                                                                                             |
|-----|-----------------------------------------------------------------------------------------------------------------------------------------------------------------------------------------------------------------------------------------------------------------------------------------------------------------------------------------------------------------------------------------------------------------------------|
| 133 | National Centre for Social Research and University of Leicester, Adult Psychiatric Morbidity Survey, 2007 [computer file]. 3rd Edition. Colchester, Essex: UK Data Archive [distributor], January 2011. SN: 6379, <a href="http://dx.doi.org/10.5255/UKDA-SN-6379-1">http://dx.doi.org/10.5255/UKDA-SN-6379-1</a>                                                                                                           |
| 134 | National Centre for Social Research et al. , National Survey of Sexual Attitudes and Lifestyles II, 2000-2001 [computer file]. Colchester, Essex: UK Data Archive [distributor], August 2005. SN: 5223, <a href="http://dx.doi.org/10.5255/UKDA-SN-5223-1">http://dx.doi.org/10.5255/UKDA-SN-5223-1</a>                                                                                                                     |
| 135 | Southern Africa Labour and Development Research Unit. National Income Dynamics Study 2010-2011, Wave 2. Version 1.0. Cape Town: Southern Africa Labour and Development Research Unit [producer], 2012. Cape Town: DataFirst [distributor], 2013                                                                                                                                                                             |
| 136 | Southern Africa Labour and Development Research Unit. National Income Dynamics Study 2012, Wave 3 [dataset]. Version 1.2. Cape Town: Southern Africa Labour and Development Research Unit [producer], 2013. Cape Town: DataFirst [distributor], 2013                                                                                                                                                                        |
| 137 | Holdsworth M, Gartner A, Landais E, Maire B, Delpuech F. Perceptions of healthy and desirable body size in urban Senegalese women. <i>Int J Obes Relat Metab Disord.</i> 2004; 28(12): 1561-8                                                                                                                                                                                                                               |
| 138 | Steyn K, Bourne L, Jooste P, Fourie JM, Rossouw K, Lombard C. Anthropometric profile of a black population of the Cape Peninsula in South Africa. <i>East Afr Med J.</i> 1998; 75(1): 35-40                                                                                                                                                                                                                                 |
| 139 | Temple NJ, Steyn K, Hoffman M, Levitt NS, Lombard CJ. The epidemic of obesity in South Africa: a study in a disadvantaged community. <i>Ethn Dis.</i> 2001; 11(3): 431-7                                                                                                                                                                                                                                                    |
| 140 | Human Sciences Research Council, South African Medical Research Council. South Africa National Health and Nutrition Examination Survey 2012                                                                                                                                                                                                                                                                                 |
| 141 | Duboz P, Boetsch G, Gueye L, Macia E. Hypertension prevalence, awareness, treatment and control in Dakar (Senegal). <i>J Hum Hypertens.</i> 2014; 28(8): 489-93                                                                                                                                                                                                                                                             |
| 142 | Ghana Statistical Service, Macro International, Inc. Ghana Demographic and Health Survey 1993-1994. Calverton, United States: Macro International, Inc                                                                                                                                                                                                                                                                      |
| 143 | Ghana Statistical Service, Macro International, Inc. Ghana Demographic and Health Survey 1998-1999. Calverton, United States: Macro International, Inc                                                                                                                                                                                                                                                                      |
| 144 | Ghana Statistical Service, Macro International, Inc. Ghana Demographic and Health Survey 2003. Calverton, United States: Macro International, Inc                                                                                                                                                                                                                                                                           |
| 145 | Central Statistical Office (Swaziland), Macro International, Inc. Swaziland Demographic and Health Survey 2006-2007. Calverton, United States: Macro International, Inc                                                                                                                                                                                                                                                     |
| 146 | Ghana Statistical Service, Macro International, Inc, Ministry of Health (Ghana). Ghana Demographic and Health Survey 2008. Calverton, United States: Macro International, Inc                                                                                                                                                                                                                                               |
| 147 | Macro International, Inc, Statistics Sierra Leone. Sierra Leone Demographic and Health Survey 2008. Calverton, United States: Macro International, Inc                                                                                                                                                                                                                                                                      |
| 148 | World Health Organization (WHO). Ghana World Health Survey 2003. Geneva, Switzerland: World Health Organization (WHO), 2005                                                                                                                                                                                                                                                                                                 |
| 149 | World Health Organization (WHO). Swaziland World Health Survey 2003. Geneva, Switzerland: World Health Organization (WHO), 2005                                                                                                                                                                                                                                                                                             |
| 150 | Ministry of Health and Sanitation (Sierra Leone), World Health Organization (WHO). Sierra Leone STEPS Noncommunicable Disease Risk Factors Survey 2009                                                                                                                                                                                                                                                                      |
| 151 | Centre for the Study of African Economies (CSAE), Ghana Statistical Service. Ghana Urban Household Panel Survey 2006. Oxford, United Kingdom: Centre for the Study of African Economies (CSAE)                                                                                                                                                                                                                              |
| 152 | Ministry of Health (Swaziland), World Health Organization (WHO). Swaziland STEPS Noncommunicable Disease Risk Factors Survey 2007                                                                                                                                                                                                                                                                                           |
| 153 | World Health Organization (2005). Study on Global Ageing and Adult Health (SAGE), Pilot Study, 2005 (Data Set 27-28, Cunningham, Shayna.) [machine-readable data file and documentation]. Geneva, Switzerland: World Health Organization (Producer). Los Altos, CA: Sociometrics Corporation, Data Archive of Social Research on Aging (Producer & Distributor)                                                             |
| 154 | ICF International, Ministry of Health and Sanitation (Sierra Leone), Statistics Sierra Leone. Sierra Leone Demographic and Health Survey 2013. Fairfax, United States: ICF International, 2014                                                                                                                                                                                                                              |
| 155 | Centre for International Health and Development, Institute of Child Health (CIHD), Food and Nutrition Security Analysis Unit (Somalia), Ministry of Health (Somalia), Ministry of Health and Labor (Somaliland), Puntland Ministry of Health (Somalia), United Nations Children's Fund (UNICEF), World Food Programme (WFP), World Health Organization (WHO). Somalia National Micronutrient and Anthropometric Survey 2009 |
| 156 | Ghana Health Service, Ghana Statistical Service, ICF International. Ghana Demographic and Health Survey 2014. Fairfax, United States: ICF International, 2015                                                                                                                                                                                                                                                               |
| 157 | Ghana Health Service, World Health Organization (WHO). Ghana - Greater Accra Region STEPS Noncommunicable Disease Risk Factors Survey 2006                                                                                                                                                                                                                                                                                  |
| 158 | Ministry of Health (Swaziland), World Health Organization (WHO). Swaziland STEPS Noncommunicable Disease Risk Factors Survey 2014                                                                                                                                                                                                                                                                                           |
| 159 | Macro International, Inc, National Statistics and Evaluation Office (Eritrea). Eritrea Demographic and Health Survey 2002. Calverton, United States: Macro International, Inc                                                                                                                                                                                                                                               |
| 160 | Macro International, Inc, National Statistics Office (Eritrea). Eritrea Demographic and Health Survey 1995-1996. Calverton, United States: Macro International, Inc                                                                                                                                                                                                                                                         |
| 161 | Macro International, Inc, National Statistics Directorate (Guinea). Guinea Demographic and Health Survey 1999. Calverton, United States: Macro International, Inc                                                                                                                                                                                                                                                           |
| 162 | Macro International, Inc, National Statistics Directorate (Guinea). Guinea Demographic and Health Survey 2005. Calverton, United States: Macro International, Inc                                                                                                                                                                                                                                                           |
| 163 | Department of Statistics (Togo), Macro International, Inc. Togo Demographic and Health Survey 1998. Calverton, United States: Macro International, Inc                                                                                                                                                                                                                                                                      |
| 164 | Central Statistical Office (Zimbabwe), Macro International, Inc. Zimbabwe Demographic and Health Survey 1994. Calverton, United States: Macro International, Inc                                                                                                                                                                                                                                                            |
| 165 | Central Statistical Office (Zimbabwe), Macro International, Inc. Zimbabwe Demographic and Health Survey 1999. Calverton, United States: Macro International, Inc                                                                                                                                                                                                                                                            |
| 166 | Central Statistical Office (Zimbabwe), Macro International, Inc. Zimbabwe Demographic and Health Survey 2005-2006. Calverton, United States: Macro International, Inc                                                                                                                                                                                                                                                       |
| 167 | World Health Organization (WHO). Zimbabwe World Health Survey 2003. Geneva, Switzerland: World Health Organization (WHO), 2005                                                                                                                                                                                                                                                                                              |
| 168 | Ministry of Health and Child Welfare (Zimbabwe), University of Zimbabwe, World Health Organization (WHO). Zimbabwe STEPS Noncommunicable Disease Risk Factors Survey 2005                                                                                                                                                                                                                                                   |
| 169 | Ministry of Health (Eritrea), World Health Organization (WHO). Eritrea STEPS Noncommunicable Disease Risk Factors Survey 2004                                                                                                                                                                                                                                                                                               |
| 170 | ICF Macro, Zimbabwe National Statistics Agency. Zimbabwe Demographic and Health Survey 2010-2011. Calverton, United States: ICF Macro, 2012                                                                                                                                                                                                                                                                                 |
| 171 | Ministry of Health (Togo), West African Health Organization, World Health Organization (WHO). Togo STEPS Noncommunicable Disease Risk Factors Survey 2010-2011                                                                                                                                                                                                                                                              |

|     |                                                                                                                                                                                                                        |
|-----|------------------------------------------------------------------------------------------------------------------------------------------------------------------------------------------------------------------------|
| 172 | World Health Organization (WHO). Guinea - Conakry STEPS Noncommunicable Disease Risk Factors Survey 2009                                                                                                               |
| 173 | Division of Statistics and Economic Studies (Central African Republic), Macro International, Inc. Central African Republic Demographic and Health Survey 1994-1995. Calverton, United States: Macro International, Inc |
| 174 | Macro International, Inc, Population and Housing Census Commissions Office (PHCCO). Ethiopia Demographic and Health Survey 2005. Calverton, United States: Macro International, Inc                                    |
| 175 | Central Statistical Agency (Ethiopia), ORC Macro. Ethiopia Demographic and Health Survey 2000. Calverton, United States: ORC Macro, 2001                                                                               |
| 176 | Bureau of Statistics (Tanzania), Macro International, Inc, Ministry of Health (Tanzania). Tanzania Demographic and Health Survey 1991-1992. Calverton, United States: Macro International, Inc                         |
| 177 | Bureau of Statistics (Tanzania), Macro International, Inc, Planning Commission (Tanzania). Tanzania Demographic and Health Survey 1996. Calverton, United States: Macro International, Inc                             |
| 178 | Macro International, Inc, National Bureau of Statistics (Tanzania). Tanzania Demographic and Health Survey 2004-2005. Calverton, United States: Macro International, Inc                                               |
| 179 | Central Statistical Agency (Ethiopia), ICF Macro, Ministry of Health (Ethiopia). Ethiopia Demographic and Health Survey 2010-2011. Calverton, United States: ICF Macro                                                 |
| 180 | ICF Macro, National Bureau of Statistics (Tanzania). Tanzania Demographic and Health Survey 2009-2010. Calverton, United States: ICF Macro                                                                             |
| 181 | World Health Organization (WHO). Ethiopia World Health Survey 2003. Geneva, Switzerland: World Health Organization (WHO), 2005                                                                                         |
| 182 | World Health Organization (WHO). Ethiopia - Addis Ababa STEPS Noncommunicable Disease Risk Factors Survey 2006                                                                                                         |
| 183 | World Health Organization (WHO). Central African Republic - Bangui STEPS Noncommunicable Disease Risk Factors Survey 2010                                                                                              |
| 184 | National Institute for Medical Research (Tanzania), World Health Organization (WHO). Tanzania STEPS Noncommunicable Disease Risk Factors Survey 2012                                                                   |
| 185 | Ministry of Health (Zanzibar), World Health Organization (WHO). Tanzania - Zanzibar STEPS Noncommunicable Disease Risk Factors Survey 2011                                                                             |
| 186 | World Health Organization (WHO). Ethiopia - Butajira STEPS Noncommunicable Disease Risk Factors Survey 2003                                                                                                            |
| 187 | Mengistu MD. Pattern of blood pressure distribution and prevalence of hypertension and prehypertension among adults in Northern Ethiopia: disclosing the hidden burden. BMC Cardiovasc Disord. 2014; 14: 33            |

**Supplementary Table 5:** Covariates and mediators used in Global Burden of Disease 2015 dietary risk factors study (*source: GBD 2015 Risk Factors Collaborators. Global, regional, and national comparative risk assessment of 79 behavioural, environmental and occupational, and metabolic risks or clusters of risks, 1990–2015: a systematic analysis for the Global Burden of Disease Study 2015. The Lancet. 2016 Oct 7; 388:1659–1724.*)

| Dietary risk                            | Covariates used in modeling |                   |                               |               |               |               |                                                                                                                    | Metabolic mediators used |                         |                        |                         |
|-----------------------------------------|-----------------------------|-------------------|-------------------------------|---------------|---------------|---------------|--------------------------------------------------------------------------------------------------------------------|--------------------------|-------------------------|------------------------|-------------------------|
|                                         | sex                         | Suboptimal metric | Nationally Representativeness | Data from FFQ | Data from HBS | Data from FAO | Country level covariate                                                                                            | Body Mass Index          | Total Serum Cholesterol | Fasting Plasma Glucose | Systolic Blood Pressure |
| Diet low in fruits                      | √                           | √                 | √                             | √             | √             | √             |                                                                                                                    | √                        | √                       | √                      | √                       |
| Diet low in vegetables                  | √                           | √                 | √                             | √             | √             | √             |                                                                                                                    | √                        | √                       | √                      | √                       |
| Diet low in whole grains                | √                           | √                 | √                             | √             | √             | x             |                                                                                                                    | √                        | √                       | √                      | x                       |
| Diet low in nuts and seeds              | √                           | √                 | √                             | √             | √             | √             |                                                                                                                    | √                        | √                       | √                      | √                       |
| Diet low in milk                        | √                           | √                 | √                             | √             | √             | √             |                                                                                                                    | x                        | x                       | x                      | x                       |
| Diet high in red meat                   | √                           | √                 | √                             | √             | √             | √             |                                                                                                                    | √                        | x                       | √                      | x                       |
| Diet high in processed meat             | √                           | √                 | √                             | √             | √             | x             | National availability of red meat (grams/person/day)<br>National availability of pig meat (% of energy/person/day) | √                        | x                       | √                      | √                       |
| Diet high in sugar-sweetened beverages  | √                           | √                 | √                             | √             | √             | x             | National availability of sugar (Kcal/person/day)                                                                   | x                        | x                       | x                      | x                       |
| Diet low in fiber                       | √                           | √                 | √                             | √             | √             | √             |                                                                                                                    | x                        | √                       | x                      | x                       |
| Diet suboptimal in calcium              | √                           | √                 | √                             | √             | √             | √             |                                                                                                                    | x                        | x                       | x                      | x                       |
| Diet low in seafood omega-3 fatty acids | √                           | √                 | √                             | √             | √             | √             | Landlocked nation (Yes./No)                                                                                        | √                        | x                       | x                      | √                       |
| Diet low in polyunsaturated fatty acids | √                           | √                 | √                             | √             | √             | √             |                                                                                                                    | x                        | √                       | √                      | x                       |
| Diet high in trans fatty acids          | √                           | √                 | √                             | √             | √             | x             | National availability of hydrogenated oil (% of energy/person/day)                                                 | √                        | √                       | x                      | x                       |
| Diet high in sodium                     | √                           | x                 | √                             | x             | x             | x             |                                                                                                                    | x                        | x                       | x                      | x                       |

FFQ – food frequency questionnaire; HBS – household budget survey; FAO-Food and Agriculture Organization; √ - used ; x – not used.

**Supplementary Table 6: Number, rate, proportion and percentage change of deaths associated with child and maternal undernutrition in sub-Saharan countries between 1990 and 2015**

| Countries                          | Number (95% UI)           |                        |            | Rate (95% UI) per 100 000 |               |            | Proportion (%) (95% UI) |                 |            |
|------------------------------------|---------------------------|------------------------|------------|---------------------------|---------------|------------|-------------------------|-----------------|------------|
|                                    | 1990                      | 2015                   | Change (%) | 1990                      | 2015          | Change (%) | 1990                    | 2015            | Change (%) |
| <b>Sub-Saharan Africa</b>          | 1490671 (1305548-1667532) | 826204 (737346-923789) | -44.6      | 156(138-174)              | 53(47-59)     | -66.2      | 8.5% (7.4-9.5)          | 3.8% (3.4-4.3)  | -55.3      |
| <b>Central Sub-Saharan Africa</b>  | 152378 (123661-190511)    | 112914 (86048-147814)  | -25.9      | 144(118-179)              | 60(45-80)     | -58.2      | 7.5% (5.9-9.8)          | 3.9% (2.9-5.6)  | -48.4      |
| Angola                             | 49664 (35987-68401)       | 23414 (15852-33624)    | -52.9      | 203 (147-281)             | 52 (33-83)    | -74.3      | 9.8% (5.4-18.2)         | 3.6% (1.9-6.2)  | -62.9      |
| Central African Republic           | 8325 (6359-10879)         | 6928 (4778-9926)       | -16.8      | 161 (126-210)             | 100 (69-146)  | -37.9      | 6.7% (5.1-8.9)          | 4.3% (2.7-6.5)  | -36.0      |
| Congo                              | 2781 (2064-3620)          | 2098 (1377-3022)       | -24.6      | 74 (55-99)                | 34 (22-50)    | -54.3      | 3.4% (2.5-4.6)          | 2.2% (1.5-3.3)  | -35.1      |
| Democratic Republic of the Congo   | 89820 (70519-116690)      | 79615 (57529-109741)   | -11.4      | 129 (101-168)             | 63 (45-88)    | -51.1      | 7.5% (5.6-10.2)         | 4.3% (3.6-2)    | -43.0      |
| Equatorial Guinea                  | 1082 (828-1452)           | 422 (239-738)          | -61.0      | 150 (113-205)             | 34 (19-60)    | -77.2      | 6.9% (4-13)             | 2.6% (1.3-4.7)  | -61.5      |
| Gabon                              | 705 (501-978)             | 436 (284-622)          | -38.2      | 47 (34-66)                | 21 (13-31)    | -56.3      | 2.8% (2-4)              | 1.7% (1.1-2.5)  | -39.1      |
| <b>Eastern Sub-Saharan Africa</b>  | 605387 (529428-684327)    | 283319 (250895-320673) | -53.2      | 169 (149-190)             | 52 (46-59)    | -69.5      | 8.1% (7.1-9.2)          | 3.7% (3.2-4.3)  | -54.2      |
| Burundi                            | 17534 (13583-22509)       | 12868 (8902-18715)     | -26.6      | 166 (127-213)             | 69 (48-97)    | -58.2      | 5.8% (4.4-7.6)          | 4.7% (3.2-6.9)  | -19.3      |
| Comoros                            | 978 (817-1161)            | 371 (237-582)          | -62.1      | 133 (111-159)             | 37 (25-55)    | -71.9      | 7.9% (5.9-11.1)         | 3.4% (2.4-4.8)  | -56.6      |
| Djibouti                           | 1202 (1017-1404)          | 615 (464-805)          | -48.9      | 126 (106-148)             | 62 (46-82)    | -51.0      | 9.3% (7-12.2)           | 4.9% (3.1-7.2)  | -47.4      |
| Eritrea                            | 11683 (10013-13949)       | 5490 (4097-7122)       | -53.0      | 213 (182-253)             | 79 (58-108)   | -62.8      | 9.9% (8.3-12)           | 5% (3.6-7.2)    | -49.2      |
| Ethiopia                           | 218708 (172720-280525)    | 58783 (43653-76020)    | -73.1      | 231 (185-294)             | 44 (33-56)    | -81.2      | 8.6% (6.8-11)           | 3.6% (2.5-5.1)  | -58.5      |
| Kenya                              | 37490 (33943-41560)       | 25503 (21698-29999)    | -32.0      | 90 (81-101)               | 43 (36-51)    | -52.7      | 6.4% (5.7-7.3)          | 3.5% (2.9-4.1)  | -45.8      |
| Madagascar                         | 38650 (33577-46663)       | 22152 (16239-29363)    | -42.7      | 178 (156-211)             | 65 (47-86)    | -63.6      | 10.2% (8.8-12.4)        | 4.7% (3.3-6.6)  | -54.1      |
| Malawi                             | 33087 (24067-42345)       | 16589 (12470-21673)    | -49.9      | 183 (135-229)             | 61 (47-78)    | -66.8      | 9.2% (6.9-11.8)         | 4.4% (3.2-6)    | -52.3      |
| Mozambique                         | 38032 (29332-48739)       | 14111 (10209-18565)    | -62.9      | 142 (111-180)             | 34 (24-47)    | -76.1      | 7.8% (6.1-10.1)         | 2% (1.5-2.8)    | -74.0      |
| Rwanda                             | 20622 (15128-25814)       | 7293 (5272-9896)       | -64.6      | 153 (118-189)             | 48 (35-64)    | -68.8      | 6.9% (5.2-8.6)          | 4.2% (2.9-5.9)  | -39.1      |
| Somalia                            | 30489 (25670-34992)       | 26018 (20374-31920)    | -14.7      | 243 (194-304)             | 140 (102-196) | -42.5      | 11.8% (7.1-19.4)        | 7.5% (4.7-12.6) | -36.6      |
| South Sudan                        | 27967 (22670-34149)       | 20661 (15528-27020)    | -26.1      | 243 (195-306)             | 111 (80-156)  | -54.5      | 13.7% (7.5-22.2)        | 6.9% (3.9-11.3) | -49.3      |
| Tanzania                           | 69813 (57152-83841)       | 33864 (26212-43901)    | -51.5      | 100 (83-119)              | 44 (33-60)    | -70.3      | 7.6% (5.2-10.6)         | 3.5% (2.6-4.8)  | -59.6      |
| Uganda                             | 34842 (26336-42941)       | 27436 (20822-35299)    | -21.3      | 99 (78-121)               | 42 (31-54)    | -58.2      | 4.8% (3.7-6.2)          | 2.9% (2.1-4.2)  | -39.7      |
| Zambia                             | 23981 (19411-28481)       | 11408 (8508-14969)     | -52.4      | 153 (126-182)             | 52 (39-67)    | -66.4      | 8% (6.4-9.8)            | 2.8% (2.1-3.6)  | -65.4      |
| <b>Southern Sub-Saharan Africa</b> | 52501 (49300-55991)       | 19463 (16718-22467)    | -62.9      | 61 (58-65)                | 20 (17-23)    | -67.1      | 4.2% (3.9-4.5)          | 1.3% (1.1-1.5)  | -68.1      |
| Botswana                           | 1120 (950-1297)           | 284 (158-460)          | -74.6      | 45 (38-52)                | 10 (6-16)     | -77.4      | 3.6% (1.5-6.3)          | 0.7% (0.3-1.4)  | -80.8      |
| Lesotho                            | 2498 (2211-2768)          | 1521 (1099-2033)       | -39.1      | 87 (77-97)                | 50 (37-67)    | -42.6      | 5.8% (4.6-7.1)          | 1.9% (1.2-2.9)  | -67.1      |
| Namibia                            | 1664 (1438-1913)          | 767 (492-1101)         | -53.9      | 63 (54-72)                | 21 (14-30)    | -66.6      | 4.1% (3.5-4.9)          | 1.7% (1-2.8)    | -58.3      |
| South Africa                       | 36862 (34190-39912)       | 6950 (5503-8714)       | -81.1      | 66 (61-71)                | 12 (10-15)    | -81.7      | 4.5% (4.1-4.9)          | 0.8% (0.7-1)    | -81.6      |
| Swaziland                          | 1173 (1020-1326)          | 640 (438-872)          | -45.4      | 62 (54-71)                | 33 (23-45)    | -47.0      | 3.9% (3-5.2)            | 1.5% (0.9-2.5)  | -61.4      |
| Zimbabwe                           | 9185 (8132-10262)         | 9300 (7335-11655)      | 1.3        | 47 (42-52)                | 35 (28-43)    | -25.8      | 3.5% (2.9-4.2)          | 2.2% (1.6-3.1)  | -35.6      |
| <b>Western Sub-Saharan Africa</b>  | 680406 (577609-777762)    | 410508 (348886-476136) | -39.7      | 170 (145-195)             | 57 (49-66)    | -66.5      | 10.3% (8.5-12.2)        | 4.5% (3.7-5.4)  | -56.2      |
| Benin                              | 18860 (14798-23874)       | 8290 (6229-10664)      | -56.0      | 181 (143-229)             | 45 (34-58)    | -75.1      | 11.8% (9.3-15.3)        | 3.4% (2.1-5.1)  | -71.4      |
| Burkina Faso                       | 32797 (25866-39798)       | 21861 (16563-28092)    | -33.3      | 178 (141-218)             | 67 (52-86)    | -62.2      | 9.7% (7.5-12.1)         | 5% (3.3-7.3)    | -48.7      |
| Cameroon                           | 28149 (22109-35667)       | 18905 (13710-25168)    | -32.8      | 112 (88-141)              | 46 (34-61)    | -58.4      | 7.4% (5.7-9.7)          | 3.1% (2-4.6)    | -57.8      |
| Cape Verde                         | 307 (262-355)             | 43 (33-55)             | -85.9      | 45 (39-52)                | 8 (6-10)      | -83.4      | 4.5% (3.9-5.2)          | 0.9% (0.7-1.2)  | -79.5      |
| Chad                               | 31104 (25821-35590)       | 34600 (26042-42439)    | 11.2       | 233 (193-270)             | 118 (88-146)  | -49.3      | 14.1% (11.4-16.7)       | 7.8% (4.8-11.8) | -44.8      |
| Cote d'Ivoire                      | 25463 (20080-33557)       | 17790 (13491-23011)    | -30.1      | 106 (84-140)              | 45 (34-58)    | -57.4      | 6.1% (4.6-8.1)          | 3% (2-4.2)      | -51.6      |
| The Gambia                         | 1955 (1623-2281)          | 1124 (907-1376)        | -42.5      | 148 (123-176)             | 29 (24-37)    | -70.5      | 8.7% (7.1-10.6)         | 2.8% (2-3.8)    | -63.0      |
| Ghana                              | 26466 (22373-31510)       | 9068 (6363-12566)      | -65.7      | 99 (84-117)               | 21 (15-30)    | -78.3      | 6.2% (4.6-8.2)          | 1.8% (1.1-2.9)  | -71.0      |
| Guinea                             | 25545 (20030-32341)       | 12272 (9506-15567)     | -52.0      | 208 (163-265)             | 57 (44-72)    | -72.7      | 12.1% (9.3-15.5)        | 3.8% (2.7-5.3)  | -68.9      |
| Guinea-Bissau                      | 4484 (3625-5317)          | 2994 (2256-3833)       | -33.2      | 209 (167-252)             | 93 (70-121)   | -55.3      | 12.4% (6.2-20.2)        | 6.2% (2.7-10.7) | -49.7      |
| Liberia                            | 9683 (7803-11823)         | 3373 (2470-4328)       | -65.2      | 217 (175-264)             | 46 (34-59)    | -78.9      | 11.2% (8.3-14.3)        | 3.5% (2.4-4.9)  | -68.4      |
| Mali                               | 33162 (24637-41995)       | 21592 (15683-29071)    | -34.9      | 188 (140-239)             | 63 (46-83)    | -66.4      | 9.7% (7.2-12.5)         | 4.7% (3.3-6.7)  | -51.6      |
| Mauritania                         | 4133 (3350-5118)          | 1974 (1521-2444)       | -52.2      | 110 (91-135)              | 31 (24-38)    | -72.1      | 7.2% (5.6-9.1)          | 3.4% (2.3-4.7)  | -52.9      |
| Niger                              | 67260 (53464-79176)       | 40408 (31439-51245)    | -39.9      | 379 (299-449)             | 92 (71-116)   | -75.8      | 19.6% (15.1-23.7)       | 6.8% (4.6-9.7)  | -65.1      |



|                       |                        |                        |       |               |            |       |                  |                |       |
|-----------------------|------------------------|------------------------|-------|---------------|------------|-------|------------------|----------------|-------|
| Nigeria               | 329465 (260065-399822) | 195525 (151492-247662) | -40.7 | 173 (137-211) | 57 (44-71) | -67.3 | 11% (7.9-14.6)   | 5.4% (3.8-7.2) | -51.1 |
| Sao Tome and Principe | 220 (188-258)          | 69 (50-90)             | -68.7 | 100 (85-117)  | 22 (16-28) | -78.4 | 8% (6.7-9.6)     | 1.9% (1.2-2.9) | -75.9 |
| Senegal               | 18074 (14725-21505)    | 9294 (7293-11421)      | -48.6 | 121 (99-144)  | 36 (28-45) | -70.6 | 7.9% (6.3-9.8)   | 2.9% (1.9-4.3) | -63.1 |
| Sierra Leone          | 15608 (11693-19954)    | 7069 (5086-9344)       | -54.7 | 196 (147-252) | 64 (47-85) | -67.1 | 11.8% (8.3-15.7) | 4% (2.7-5.7)   | -65.9 |
| Togo                  | 7660 (6198-9359)       | 4255 (3246-5427)       | -44.5 | 102 (83-125)  | 34 (26-44) | -66.4 | 6.7% (5.3-8.5)   | 2.5% (1.7-3.6) | -62.8 |

*UI: uncertainty interval; rates and proportions are age-standardized. Proportion was calculated out of all-cause of death.*

**Supplementary Table 7:** Number, rate, proportion and percentage change of deaths associated with high body mass index in sub-Saharan countries between 1990 and 2015

| Countries                          | Number (95% UI)       |                        |            | Rate (95% UI) per 100 000 |               |          | Proportion (%) (95% UI) |                  |              |
|------------------------------------|-----------------------|------------------------|------------|---------------------------|---------------|----------|-------------------------|------------------|--------------|
|                                    | 1990                  | 2015                   | Change (%) | 1990                      | 2015          | Change % | 1990                    | 2015             | Change % (%) |
| <b>Sub-Saharan Africa</b>          | 109407 (71767-152893) | 266768 (189051-353096) | 143.8      | 59 (39-83)                | 73 (51-97)    | 23.3     | 3.2% (2.1-4.6)          | 5.3% (3.8-7)     | 63.3         |
| <b>Central Sub-Saharan Africa</b>  | 13683 (7705-21628)    | 29013 (15050-51043)    | 112.0      | 67 (38-105)               | 68 (37-116)   | 1.6      | 3.5% (2.1-5)            | 4.3% (2.6-6.5)   | 24.6         |
| Angola                             | 2293 (491-5650)       | 10024 (2998-27549)     | 337.1      | 59 (14-138)               | 122 (40-304)  | 108.7    | 2.4% (1.1-4.1)          | 7.2% (4.6-10.5)  | 195.1        |
| Central African Republic           | 802 (392-1348)        | 2537 (961-4857)        | 216.3      | 54 (26-91)                | 108 (42-204)  | 99.7     | 2.2% (1.1-3.6)          | 4.4% (2.5-6.6)   | 95.9         |
| Congo                              | 1273 (738-1924)       | 2491 (1253-4391)       | 95.7       | 122 (71-183)              | 126 (66-218)  | 3.5      | 5.6% (3.5-8)            | 8% (5.4-11)      | 44.1         |
| Democratic Republic of the Congo   | 8449 (4411-13654)     | 12293 (5559-21515)     | 45.5       | 63 (33-102)               | 42 (19-75)    | -32.9    | 3.6% (2.2-5.2)          | 2.8% (1.5-4.4)   | -21.9        |
| Equatorial Guinea                  | 171 (44-386)          | 456 (170-1360)         | 166.3      | 90 (25-197)               | 118 (48-323)  | 31.3     | 3.6% (2-5.7)            | 7.9% (5.1-11.5)  | 117.3        |
| Gabon                              | 695 (456-1001)        | 1211 (702-1983)        | 74.4       | 115 (74-165)              | 130 (76-211)  | 13.2     | 6.8% (4.6-9.3)          | 10.5% (7.7-13.8) | 55.0         |
| <b>Eastern Sub-Saharan Africa</b>  | 32585 (18538-49585)   | 76417 (46080-111311)   | 134.5      | 46 (26-72)                | 54 (33-80)    | 16.8     | 2.2% (1.2-3.4)          | 3.9% (2.4-5.5)   | 75.1         |
| Burundi                            | 1436 (587-2582)       | 905 (306-1916)         | -37.0      | 62 (25-114)               | 22 (8-46)     | -64.2    | 2.2% (1-3.7)            | 1.5% (0.6-2.7)   | -31.6        |
| Comoros                            | 100 (40-186)          | 164 (81-275)           | 62.7       | 59 (23-110)               | 48 (23-83)    | -17.9    | 3.4% (1.7-5.3)          | 4.3% (2.5-6.4)   | 28.6         |
| Djibouti                           | 84 (34-158)           | 468 (211-930)          | 454.2      | 37 (15-71)                | 101 (48-193)  | 171.0    | 2.7% (1.3-4.5)          | 7.5% (5-10.4)    | 182.4        |
| Eritrea                            | 573 (322-888)         | 751 (289-1604)         | 31.1       | 57 (31-91)                | 39 (15-81)    | -31.7    | 2.6% (1.5-4)            | 2.3% (1.2-3.8)   | -11.0        |
| Ethiopia                           | 6637 (2795-11717)     | 17938 (8226-32920)     | 170.3      | 33 (14-58)                | 45 (21-81)    | 38.7     | 1.2% (0.5-2.2)          | 3.6% (2-5.6)     | 197.5        |
| Kenya                              | 2278 (1315-3399)      | 7541 (5129-10329)      | 231.1      | 29 (16-44)                | 44 (29-62)    | 53.4     | 2.1% (1.2-3.1)          | 3.6% (2.4-5)     | 75.0         |
| Madagascar                         | 2565 (1395-3971)      | 4956 (2176-9416)       | 93.2       | 53 (29-83)                | 51 (23-95)    | -5.1     | 3.1% (1.6-4.8)          | 3.6% (1.9-5.7)   | 16.3         |
| Malawi                             | 948 (399-1656)        | 2896 (1366-5220)       | 205.4      | 27 (11-49)                | 47 (22-84)    | 74.5     | 1.3% (0.6-2.4)          | 3.3% (1.8-5)     | 146.3        |
| Mozambique                         | 2128 (1131-3415)      | 9154 (4072-17273)      | 330.2      | 40 (21-65)                | 83 (38-156)   | 106.9    | 2.2% (1.2-3.5)          | 4.8% (2.8-7.3)   | 117.3        |
| Rwanda                             | 1147 (509-2028)       | 1760 (781-3432)        | 53.5       | 49 (21-89)                | 41 (18-79)    | -15.6    | 2.2% (1-3.8)            | 3.5% (1.8-5.7)   | 60.1         |
| Somalia                            | 2194 (525-5275)       | 3059 (723-7431)        | 39.4       | 79 (20-183)               | 74 (19-169)   | -5.7     | 3.3% (1.7-5.3)          | 3.5% (1.9-5.4)   | 5.4          |
| South Sudan                        | 1261 (323-3327)       | 3681 (1022-10176)      | 191.9      | 51 (14-127)               | 70 (21-189)   | 37.8     | 2.5% (1.2-4.2)          | 3.7% (2.1-5.8)   | 51.0         |
| Tanzania                           | 6348 (4099-9125)      | 10505 (4567-20840)     | 65.5       | 70 (44-101)               | 52 (23-101)   | -25.3    | 4.1% (2.7-5.8)          | 4% (2.3-6.1)     | -2.7         |
| Uganda                             | 2927 (1441-4942)      | 6872 (2917-12716)      | 134.8      | 52 (26-88)                | 59 (25-110)   | 13.0     | 2.5% (1.3-4.1)          | 4% (2.1-6.2)     | 58.0         |
| Zambia                             | 1942 (1168-2876)      | 5709 (3188-9140)       | 194.0      | 73 (43-108)               | 104 (59-166)  | 41.1     | 3.8% (2.4-5.4)          | 5.5% (3.6-7.7)   | 43.5         |
| <b>Southern Sub-Saharan Africa</b> | 35031 (27735-42711)   | 67889 (54186-81717)    | 93.8       | 146 (114-180)             | 157 (124-190) | 8.0      | 9.9% (7.8-12.1)         | 10.4% (8.3-12.4) | 4.3          |
| Botswana                           | 458 (146-1165)        | 1782 (604-5571)        | 288.7      | 95 (32-226)               | 161 (59-460)  | 70.0     | 6.1% (4-8.7)            | 8.7% (5.6-13.2)  | 43.0         |
| Lesotho                            | 644 (390-966)         | 2028 (1047-3644)       | 214.9      | 86 (52-129)               | 209 (109-371) | 142.4    | 5.7% (3.6-7.9)          | 7.6% (5.1-11.1)  | 34.8         |
| Namibia                            | 412 (262-597)         | 804 (441-1438)         | 95.4       | 73 (46-106)               | 73 (41-128)   | 0.2      | 4.7% (3-6.8)            | 5.7% (3.7-8.2)   | 20.7         |
| South Africa                       | 30913 (24715-37418)   | 57640 (45522-69419)    | 86.5       | 167 (132-204)             | 169 (132-205) | 0.9      | 11.3% (9.1-13.6)        | 11.6% (9.4-13.7) | 2.3          |
| Swaziland                          | 531 (340-749)         | 1338 (617-2417)        | 151.9      | 189 (124-263)             | 249 (120-438) | 31.9     | 11.7% (9.1-14.4)        | 10.8% (7.5-14.9) | -7.8         |
| Zimbabwe                           | 2072 (1256-2976)      | 4295 (2164-7429)       | 107.3      | 55 (33-79)                | 78 (39-133)   | 42.0     | 4% (2.6-5.7)            | 4.8% (3-6.8)     | 19.4         |
| <b>Western Sub-Saharan Africa</b>  | 28107 (15240-44439)   | 93450 (63598-130648)   | 232.5      | 34 (18-55)                | 64 (42-89)    | 84.4     | 2.1% (1.1-3.3)          | 5% (3.5-6.7)     | 140.7        |
| Benin                              | 709 (386-1093)        | 4499 (2094-8098)       | 534.2      | 34 (18-54)                | 105 (50-180)  | 206.3    | 2.2% (1.2-3.4)          | 7.4% (5.2-9.8)   | 234.2        |
| Burkina Faso                       | 592 (231-1103)        | 3615 (1771-6645)       | 510.4      | 17 (7-32)                 | 62 (30-111)   | 263.8    | 0.9% (0.4-1.6)          | 4.4% (2.7-6.4)   | 377.2        |
| Cameroon                           | 3348 (2046-4804)      | 10077 (5169-18188)     | 201.0      | 64 (39-94)                | 111 (57-195)  | 72.0     | 4.3% (2.7-6)            | 7.2% (4.8-10.1)  | 68.2         |
| Cape Verde                         | 67 (40-99)            | 184 (120-258)          | 174.9      | 40 (24-60)                | 62 (41-87)    | 55.2     | 4% (2.4-6)              | 7.7% (5.2-10.5)  | 90.5         |
| Chad                               | 583 (290-959)         | 3948 (1643-7413)       | 577.6      | 25 (12-41)                | 85 (36-158)   | 245.2    | 1.5% (0.8-2.4)          | 5.2% (3.3-7.5)   | 254.4        |
| Cote d'Ivoire                      | 1690 (850-2809)       | 6515 (3048-11682)      | 285.6      | 32 (15-54)                | 65 (31-115)   | 101.8    | 1.9% (0.9-3.1)          | 4.1% (2.4-6.1)   | 122.2        |
| The Gambia                         | 166 (74-317)          | 451 (248-733)          | 171.4      | 51 (23-96)                | 68 (38-108)   | 34.2     | 3.7% (2.1-5.7)          | 6.4% (4.2-8.9)   | 72.7         |
| Ghana                              | 2110 (911-3985)       | 11044 (5179-20695)     | 423.3      | 35 (15-66)                | 88 (42-161)   | 151.9    | 2.2% (1-3.8)            | 7% (4.5-10.1)    | 226.5        |
| Guinea                             | 881 (482-1387)        | 3308 (1610-5798)       | 275.3      | 32 (17-50)                | 62 (30-107)   | 95.6     | 1.8% (1-2.8)            | 4% (2.4-6)       | 116.3        |
| Guinea-Bissau                      | 164 (40-477)          | 738 (187-2222)         | 351.2      | 31 (8-89)                 | 87 (24-241)   | 177.2    | 1.6% (0.7-3)            | 4.6% (2.4-7.6)   | 189.9        |
| Liberia                            | 711 (445-1048)        | 1677 (941-2776)        | 135.7      | 84 (52-123)               | 93 (53-151)   | 10.9     | 4.3% (2.9-5.8)          | 7% (4.9-9.3)     | 63.8         |
| Mali                               | 1280 (619-2158)       | 5070 (2690-8399)       | 296.0      | 33 (16-57)                | 87 (47-144)   | 163.9    | 1.7% (0.8-2.9)          | 6.3% (4.2-8.8)   | 270.8        |
| Mauritania                         | 548 (364-785)         | 1384 (746-2312)        | 152.4      | 66 (42-95)                | 83 (45-136)   | 26.2     | 4.3% (2.8-6)            | 8.8% (6.3-11.6)  | 106.4        |

|                       |                    |                     |       |            |             |       |                |                |       |
|-----------------------|--------------------|---------------------|-------|------------|-------------|-------|----------------|----------------|-------|
| Niger                 | 778 (389-1280)     | 3274 (1605-5710)    | 320.7 | 28 (13-46) | 46 (24-82)  | 68.9  | 1.4% (0.7-2.3) | 3.4% (1.9-5.1) | 139.0 |
| Nigeria               | 12242 (5277-22839) | 29972 (16886-54006) | 144.8 | 31 (14-58) | 45 (26-80)  | 44.7  | 1.9% (0.9-3.3) | 4.2% (2.7-6.1) | 116.1 |
| Sao Tome and Principe | 27 (16-40)         | 65 (32-110)         | 142.5 | 48 (29-72) | 84 (42-142) | 74.4  | 3.9% (2.4-5.5) | 7.2% (4.9-10)  | 86.8  |
| Senegal               | 1253 (731-1880)    | 3966 (1728-7440)    | 216.6 | 42 (25-64) | 70 (31-127) | 64.8  | 2.8% (1.6-4.1) | 5.5% (3.3-7.9) | 96.8  |
| Sierra Leone          | 527 (254-926)      | 1972 (1051-3328)    | 274.3 | 29 (14-52) | 78 (42-130) | 164.7 | 1.7% (0.9-2.8) | 4.7% (3.1-6.9) | 171.8 |
| Togo                  | 429 (208-721)      | 1687 (769-2959)     | 293.0 | 29 (14-48) | 59 (28-103) | 106.1 | 1.9% (0.9-3.1) | 4.1% (2.4-6.1) | 120.9 |

*UI: uncertainty interval; rates and proportions are age-standardized. Proportion was calculated out of all-cause of death.*

**Supplementary Table 8:** Number, rate, proportion and percentage change of deaths associated with dietary risks of non-communicable diseases in sub-Saharan countries between 1990 and 2015

| Countries                          | Number (95% UI)        |                        |            | Rate (95% UI) per 100 000 |               |            | Proportion % (%) (95% UI) |                   |            |
|------------------------------------|------------------------|------------------------|------------|---------------------------|---------------|------------|---------------------------|-------------------|------------|
|                                    | 1990                   | 2015                   | Change (%) | 1990                      | 2015          | Change (%) | 1990                      | 2015              | Change (%) |
| <b>Sub-Saharan Africa</b>          | 322932 (271234-387047) | 558578 (453433-680197) | 73.0       | 191 (158-231)             | 169 (138-208) | -11.5      | 10.9% (9.2-13.1)          | 12.8% (10.7-15.3) | 17.2       |
| <b>Central Sub-Saharan Africa</b>  | 37715 (25752-53853)    | 73490 (45379-107237)   | 94.9       | 206 (141-292)             | 194 (121-276) | -5.8       | 7.9% (6.4-9.7)            | 11% (8.8-13.5)    | 15.9       |
| Angola                             | 9504 (2689-20138)      | 17292 (6180-44883)     | 81.9       | 267 (87-512)              | 235 (95-527)  | -11.9      | 10% (8.3-12.2)            | 14% (11.4-17.2)   | 25.0       |
| Central African Republic           | 3571 (2694-4628)       | 6174 (2992-10241)      | 72.9       | 271 (204-347)             | 285 (146-457) | 5.1        | 10.7% (8.1-13.6)          | 12.4% (9.1-15.7)  | 4.6        |
| Congo                              | 3097 (2286-4031)       | 4378 (2516-6731)       | 41.3       | 317 (239-408)             | 239 (142-356) | -24.6      | 11.4% (9.4-14)            | 13% (10.4-16.1)   | 5.5        |
| Democratic Republic of the Congo   | 19735 (11944-29835)    | 43431 (24585-65158)    | 120.1      | 170 (101-256)             | 172 (99-256)  | 1.5        | 14.4% (11.8-17.8)         | 15% (12.2-18.5)   | 18.1       |
| Equatorial Guinea                  | 548 (165-1056)         | 678 (311-1877)         | 23.7       | 306 (102-556)             | 195 (97-475)  | -36.2      | 11.4% (9.1-14.5)          | 12.8% (10.3-16.2) | 6.3        |
| Gabon                              | 1259 (946-1628)        | 1537 (957-2422)        | 22.1       | 221 (166-285)             | 169 (106-264) | -23.3      | 11.5% (9.2-14.3)          | 14.4% (11.5-17.7) | 4.9        |
| <b>Eastern Sub-Saharan Africa</b>  | 135083 (111972-166003) | 222631 (171455-293795) | 64.8       | 213 (176-265)             | 173 (132-226) | -19.1      | 12.5% (9.1-15.9)          | 13.3% (10.4-16.9) | 21.1       |
| Burundi                            | 6952 (4244-10350)      | 6074 (3319-9878)       | -12.6      | 341 (215-485)             | 174 (100-276) | -49.0      | 8.9% (7.5-10.6)           | 10.3% (8.2-12.6)  | -3.0       |
| Comoros                            | 346 (200-561)          | 402 (248-616)          | 16.3       | 235 (141-364)             | 149 (96-224)  | -36.6      | 14.5% (12.2-17.3)         | 15.3% (12.5-18.4) | -0.7       |
| Djibouti                           | 372 (220-571)          | 844 (424-1546)         | 126.6      | 200 (125-297)             | 199 (107-340) | -0.2       | 10.2% (8.5-12.5)          | 12.4% (10.2-15.1) | 4.0        |
| Eritrea                            | 1979 (1503-2610)       | 3398 (1569-6076)       | 71.7       | 246 (188-327)             | 210 (105-352) | -14.5      | 10.8% (8.8-13.3)          | 14.5% (11.7-18)   | 12.5       |
| Ethiopia                           | 52633 (41517-66930)    | 66269 (39367-106512)   | 25.9       | 290 (231-364)             | 182 (112-282) | -37.1      | 13.1% (10.7-16.1)         | 13.7% (11-17)     | 35.1       |
| Kenya                              | 5955 (4821-7297)       | 12712 (10244-15503)    | 113.5      | 84 (69-104)               | 82 (66-99)    | -3.5       | 12.8% (8.9-16.7)          | 12.5% (9.7-16)    | 10.6       |
| Madagascar                         | 10371 (8115-13208)     | 20030 (11125-32810)    | 93.1       | 248 (194-321)             | 228 (135-363) | -8.0       | 6.9% (5.5-8.4)            | 8.3% (6.3-10.2)   | 13.2       |
| Malawi                             | 4099 (3013-5371)       | 6882 (4042-11130)      | 67.9       | 138 (101-179)             | 117 (71-186)  | -14.9      | 9.3% (7.8-11.2)           | 12% (9.4-14.9)    | 19.9       |
| Mozambique                         | 7763 (5634-10432)      | 20169 (10417-33120)    | 159.8      | 162 (117-214)             | 197 (106-315) | 21.7       | 16.1% (12.4-19.8)         | 14.5% (11.3-18.5) | 28.5       |
| Rwanda                             | 4483 (3148-6266)       | 4592 (2588-7555)       | 2.4        | 216 (155-304)             | 119 (69-194)  | -44.9      | 12% (10.1-14.3)           | 15.1% (12.5-18.5) | 5.3        |
| Somalia                            | 6012 (1809-12892)      | 8130 (2500-18248)      | 35.2       | 245 (84-482)              | 221 (78-452)  | -9.8       | 15.6% (13.3-18.6)         | 13.9% (11.8-16.5) | 0.6        |
| South Sudan                        | 3989 (1293-9417)       | 8761 (3076-21791)      | 119.6      | 196 (73-405)              | 183 (71-415)  | -6.5       | 14.9% (12.6-17.9)         | 13.4% (11.3-15.9) | 2.3        |
| Tanzania                           | 18254 (13902-23137)    | 37083 (20930-63255)    | 103.2      | 233 (178-297)             | 206 (121-337) | -11.7      | 12.1% (9.9-14.4)          | 14.8% (12.5-17.6) | 16.4       |
| Uganda                             | 7462 (4537-10655)      | 14738 (7142-23730)     | 97.5       | 139 (88-198)              | 134 (69-213)  | -3.7       | 9.2% (7.6-11)             | 11.4% (9.6-13.7)  | 35.5       |
| Zambia                             | 4342 (3155-5704)       | 12370 (7798-17995)     | 184.9      | 175 (128-231)             | 239 (154-344) | 36.8       | 11.1% (9.1-13.8)          | 10.7% (8.4-13.3)  | 39.5       |
| <b>Southern Sub-Saharan Africa</b> | 50079 (42299-59924)    | 85044 (70412-102766)   | 69.8       | 219 (184-263)             | 204 (169-246) | -7.0       | 10.4% (8.7-12.6)          | 12.2% (10.2-14.7) | -10.3      |
| Botswana                           | 927 (348-2153)         | 2443 (926-7229)        | 163.5      | 224 (95-468)              | 244 (104-633) | 9.0        | 7.4% (6.2-9.1)            | 12.3% (10.2-14.8) | -8.2       |
| Lesotho                            | 1335 (850-1859)        | 3173 (1801-5102)       | 137.7      | 195 (127-270)             | 340 (198-534) | 74.3       | 8.2% (6.5-10.1)           | 12.2% (10.1-14.8) | -2.7       |
| Namibia                            | 1238 (910-1581)        | 1739 (1032-2920)       | 40.4       | 246 (183-315)             | 183 (114-296) | -25.6      | 7.3% (5.9-8.9)            | 10.8% (8.6-13.1)  | -10.1      |
| South Africa                       | 41079 (34820-49032)    | 67352 (56143-81294)    | 64.0       | 231 (196-276)             | 203 (169-245) | -12.2      | 9.6% (6.8-12.9)           | 9.9% (7.2-13.2)   | -11.1      |
| Swaziland                          | 594 (397-836)          | 1492 (692-2544)        | 151.3      | 227 (155-316)             | 296 (150-482) | 30.5       | 13.7% (11-16.6)           | 15.9% (12.7-19.3) | -8.3       |
| Zimbabwe                           | 4905 (3579-6441)       | 8845 (5039-14031)      | 80.3       | 151 (113-196)             | 172 (100-267) | 14.0       | 11.1% (9.1-13.8)          | 10.7% (8.4-13.3)  | -3.7       |
| <b>Western Sub-Saharan Africa</b>  | 100056 (78235-127200)  | 177413 (140988-225225) | 77.3       | 151 (119-191)             | 144 (115-183) | -4.5       | 9.1% (7.2-11.5)           | 12.7% (10.5-15.5) | 24.9       |
| Benin                              | 2691 (2120-3418)       | 7317 (3722-12273)      | 171.9      | 154 (123-195)             | 197 (108-316) | 27.3       | 14.8% (11.3-18.6)         | 13.6% (9.8-18)    | 39.1       |
| Burkina Faso                       | 4154 (3252-5295)       | 8546 (4920-13830)      | 105.7      | 137 (108-175)             | 172 (104-264) | 25.2       | 11.8% (9.1-15.4)          | 11.5% (8.7-14.8)  | 64.7       |
| Cameroon                           | 6128 (4873-7639)       | 13167 (7520-22068)     | 114.9      | 135 (108-167)             | 159 (95-255)  | 17.4       | 15% (12.4-18.3)           | 17.8% (15-21.2)   | 15.6       |
| Cape Verde                         | 235 (193-288)          | 419 (329-538)          | 78.1       | 150 (123-184)             | 144 (113-185) | -3.7       | 11.1% (8.9-13.8)          | 11.6% (9-14.7)    | 18.2       |
| Chad                               | 2657 (2055-3371)       | 7136 (3540-12121)      | 168.5      | 132 (103-167)             | 178 (95-289)  | 35.1       | 13.5% (10.9-17)           | 13.4% (10.6-17.3) | 39.7       |
| Cote d'Ivoire                      | 8249 (6171-10918)      | 16341 (9143-27124)     | 98.1       | 199 (152-261)             | 205 (123-324) | 2.9        | 9.7% (6.6-12.8)           | 11.5% (7.8-15.1)  | 13.9       |
| The Gambia                         | 432 (244-724)          | 836 (546-1192)         | 93.4       | 165 (98-261)              | 158 (108-219) | -4.6       | 11.5% (9.6-13.7)          | 13.5% (11.3-16.3) | 22.4       |
| Ghana                              | 8671 (5646-12714)      | 19219 (10214-32247)    | 121.6      | 186 (127-263)             | 179 (102-290) | -3.8       | 8.6% (7.1-10.4)           | 11.7% (9.5-14.4)  | 25.1       |
| Guinea                             | 3254 (2568-4096)       | 8108 (4999-12159)      | 149.2      | 147 (118-185)             | 180 (116-265) | 22.4       | 10.3% (7.7-13.3)          | 12.8% (9.5-16.7)  | 36.3       |
| Guinea-Bissau                      | 847 (315-1969)         | 1663 (573-4643)        | 96.4       | 199 (83-427)              | 234 (92-566)  | 18.1       | 6% (5.1-7.2)              | 6.7% (5.6-7.9)    | 24.4       |
| Liberia                            | 1110 (772-1556)        | 2447 (1500-3766)       | 120.5      | 162 (116-222)             | 162 (104-241) | 0.3        | 14.2% (11.6-18.1)         | 16.1% (12.6-20.7) | 48.7       |
| Mali                               | 5837 (4601-7198)       | 8090 (4809-12758)      | 38.6       | 180 (143-220)             | 164 (102-247) | -8.7       | 12.9% (11-15.3)           | 15.2% (12.7-18.3) | 28.7       |
| Mauritania                         | 1360 (1084-1695)       | 2054 (1181-3151)       | 51.0       | 199 (159-248)             | 143 (88-213)  | -28.1      | 8.9% (6.6-11.5)           | 11.4% (8.6-14.7)  | 17.8       |

|                       |                     |                     |       |               |               |       |                  |                  |      |
|-----------------------|---------------------|---------------------|-------|---------------|---------------|-------|------------------|------------------|------|
| Niger                 | 3135 (2407-4029)    | 8701 (5237-13502)   | 177.6 | 142 (109-181) | 149 (96-221)  | 4.8   | 8.7% (6.7-10.9)  | 9.6% (7.4-12.3)  | 47.6 |
| Nigeria               | 43196 (27785-64811) | 55456 (36507-90013) | 28.4  | 139 (92-205)  | 103 (70-161)  | -25.6 | 9.6% (7.2-13.2)  | 10.2% (7.2-13.9) | 11.1 |
| Sao Tome and Principe | 77 (62-95)          | 127 (70-199)        | 64.1  | 149 (121-184) | 175 (99-273)  | 17.0  | 10.2% (8.6-12.2) | 14.5% (12-17.4)  | 25.8 |
| Senegal               | 3837 (2998-4894)    | 9146 (4897-15941)   | 138.3 | 156 (122-198) | 185 (104-308) | 18.0  | 8.8% (6.9-10.8)  | 12.1% (10-14.8)  | 41.8 |
| Sierra Leone          | 2000 (1272-2994)    | 4047 (2461-6225)    | 102.4 | 147 (99-210)  | 199 (126-295) | 35.1  | 10.5% (7.2-13.8) | 10.6% (7.9-13.3) | 38.5 |
| Togo                  | 2182 (1687-2778)    | 4586 (2767-6985)    | 110.1 | 176 (137-224) | 192 (123-282) | 9.3   | 6.7% (4.8-9)     | 9% (6.8-11.8)    | 17.9 |

*UI: uncertainty interval; rates and proportions are age-standardized. Proportion was calculated out of all-cause of death.*

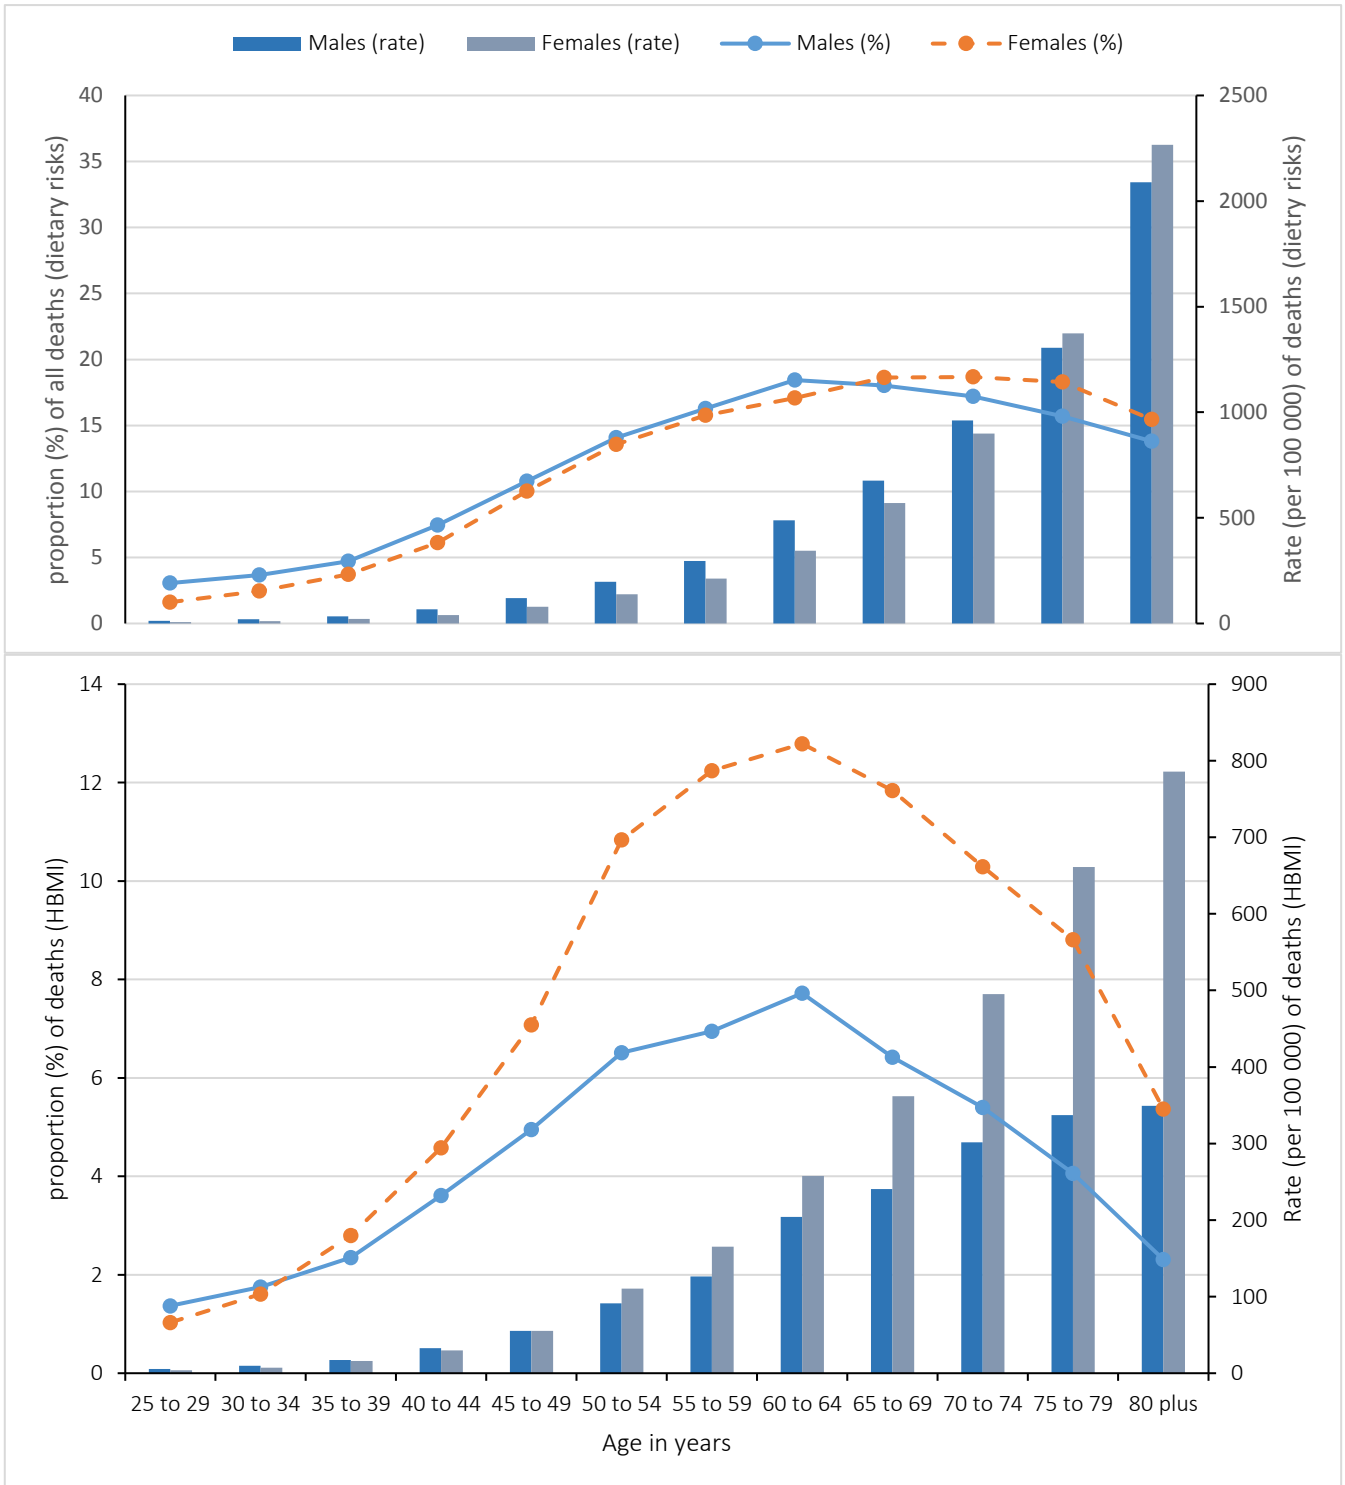

**Supplementary Figure 1:** Proportion (of all-cause) and rate of deaths associated with high-body mass index and dietary risks of non-communicable diseases in sub-Saharan countries by sex and age in 2015 (sub-Sahara Africa)

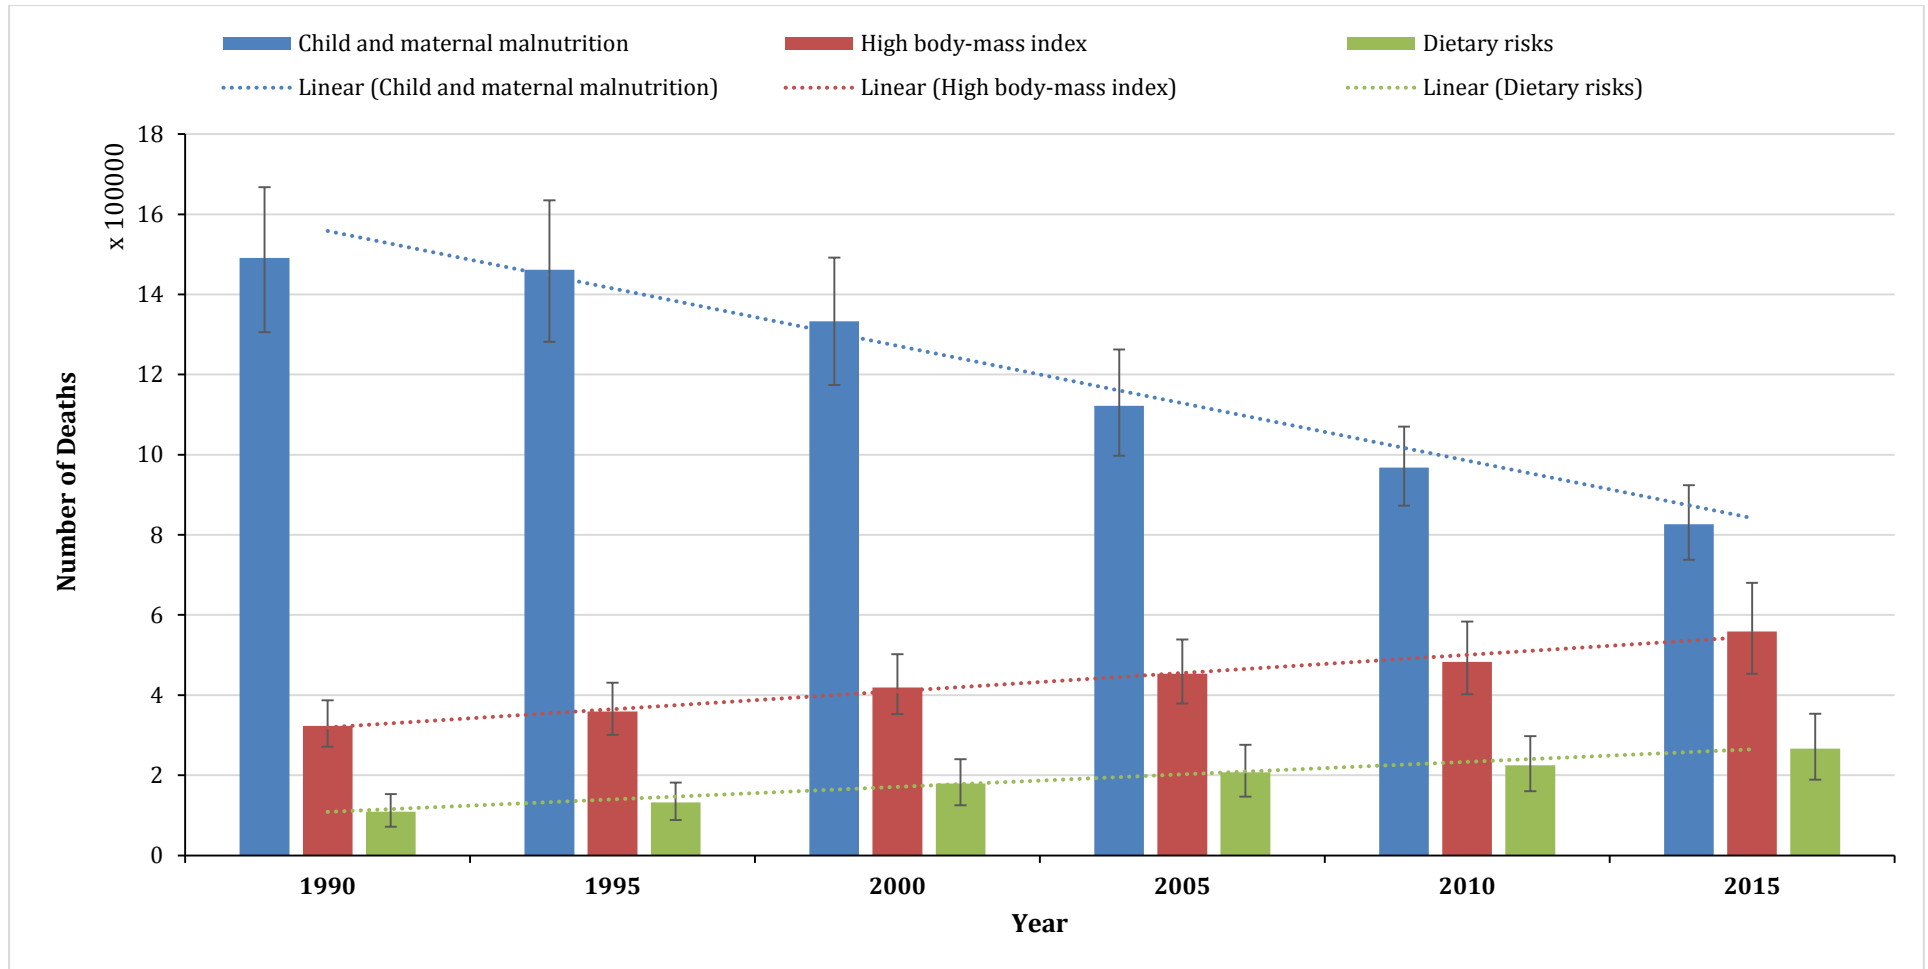

**Supplementary Figure 2:** Number of deaths associated with Child and maternal undernutrition, high body mass index and dietary risks of non-communicable diseases in sub-Saharan countries between 1990 and 2015
